# Supplementary material
Source: PubMed Central journal article supplement (PMC10935555)
Supplement: BLOOD_BLD-2022-018221-mmc1.pdf [file BLOOD_BLD-2022-018221-mmc1.pdf]

## Supplemental Methods

### Analysis of germline predisposition in MNs

To delineate the landscape of germline predispositions in myeloid neoplasms (MNs), we performed whole-genome or targeted-capture sequencing of buccal smear samples derived from 1,039 Japanese patients with MNs as germline controls. We examined variants in 23 genes previously implicated in germline predispositions (*DDX41*, *CHEK2*, *TP53*, *GATA2*, *SBDS*, *RUNX1*, *SAMD9/SAMD9L*, *CEBPA*, *ETV6*, *ANKRD26*, *RB1*, *FANCL*, *FANCD2*, *FANCE*, *FANCG*, *FANCC*, *FANCF*, *FANCM*, *FANCI*, *FANCA*, *FANCB*, and *BRCA2*).<sup>1</sup> The detected variants were curated based on ACMG criteria as performed in the classification of *DDX41* variants (**Figure 1D–F; supplemental Figure 4**). Then, we compared the frequencies of pathogenic/likely pathogenic germline variants in these genes.

### Definition of *DDX41*-mutated and -wild-type (WT) subjects

Patients with pathogenic and likely pathogenic (P/LP) germline variants and/or somatic mutations in *DDX41* were defined as *DDX41*-mutated ones. Patients with neither of them were defined as wild-type (WT) ones.

### Analysis of clonal dynamics during leukemic progression

For the analysis of clonal dynamics, serial samples before and after leukemic progression were available in 6 *DDX41*-mutated and 42 *DDX41*-WT MNs. Based on the changes of VAFs during leukemic progression, somatic mutations were classified as “newly acquired,” “persistent with increased/decreased VAF,” or “lost” and their proportions were compared across different categories of mutations (“Type-1,” “Type-2,” “*DDX41*,” and “Others”) (**Figure 5C**). The definitions of “Type-1” and “Type-2” mutations followed those in our previous publication<sup>2</sup>.

### Previous dataset of *DDX41*-mutated MNs

To delineate the regional distributions of *DDX41* variants, we collated in a meta-analysis ours and previously reported cases of *DDX41*-mutated myeloid neoplasms (MNs) (**Figure 4E**)<sup>3–7</sup>.

### Comparison of mutation frequencies

To reveal the co-mutation patterns of *DDX41*-mutated MNs, we compared the frequencies of other driver mutations between *DDX41*-mutated and -WT cases among treatment-naïve patients with MNs. Then, to reveal the mutations associated with disease progression, we compared the frequencies of driver mutations between lower-risk and higher-risk MDS, and between higher-risk MDS and sAML. These comparisons were performed within *DDX41*-mutated or -WT MNs (**Figure 5A, B; supplemental Figure 11, 12**).

### Frequencies of *DDX41* mutations in individual disease subtypes

In this study, MDS-RAEB was defined as higher-risk MDS, and the other MDS categories were included in lower-risk MDS. The category of secondary AML (n = 976 cases) included therapy-related AML (n = 43 cases; 4.4%). Scores of the revised/molecular International Prognostic Scoring System (IPSS-R/M) were calculated according to the previous publications<sup>8,9</sup>. Although all patients were classified as either AML, MDS, MDS/MPN, or MPN, the distinction between primary vs. secondary AML, and that between lower-risk vs. higher-risk MDS were impossible in 304 and 397 of the *DDX41*-WT cases, respectively, due to incomplete clinical data. Because excluding these cases might bias the frequencies of *DDX41* mutations in individual disease subtypes (**Figure 3A, 4A–C; supplemental Figure 6B**), we performed multiple imputations combined with bootstrap resampling to estimate the frequencies of *DDX41* mutations and their confidence intervals, using the R package, “bootImpute” (<https://cran.r-project.org/web/packages/bootImpute/index.html>)<sup>10</sup>. Because we observed substantial differences in the frequencies of *DDX41* mutations between Asian and Caucasian populations, the imputations for diagnosis were performed within each population.

### Survival analysis

Selection of variables in multivariable analysis was performed according to *P* values ( $<5.0 \times 10^{-2}$ ) (**supplemental**

**Table 7).** In the analysis of overall survival and leukemic progression, the observations were censored at hematopoietic stem-cell transplantation (HSCT), unless indicated otherwise (**Figure 6; supplemental Figure 15–17, 19, 20**). For overall survival analysis in the cohort of patients who underwent HSCT, observations were not censored at HSCT (**supplemental Figure 18**). We acknowledge the possibility that the smaller numbers of analyzed patients in the *DDX41*-mutant cohorts might result in negative findings when performing outcome analysis. To resolve this issue and avoid confounders, we selected *DDX41*-WT-patients with sample size adjusted to those of mutated cases. In addition, we randomly performed iterations (100 times) of such analyses (**supplemental Figure 15B–E**). To resolve the same issue for high-risk mutations, we performed the same adjustment as above in the prognostic analyses for *TP53*-WT, single-hit, and multi-hit mutation stratification (**supplemental Figure 20A**).

### Supplemental References

1. Godley LA, Shimamura A. Genetic predisposition to hematologic malignancies: management and surveillance. *Blood* 2017;130:424-32.
2. Makishima H, Yoshizato T, Yoshida K, et al. Dynamics of clonal evolution in myelodysplastic syndromes. *Nat Genet* 2017;49:204-12.
3. Polprasert C, Schulze I, Sekeres MA, et al. Inherited and Somatic Defects in *DDX41* in Myeloid Neoplasms. *Cancer Cell* 2015;27:658-70.
4. Sebert M, Passet M, Raimbault A, et al. Germline *DDX41* mutations define a significant entity within adult MDS/AML patients. *Blood* 2019;134:1441-4.
5. Choi EJ, Cho YU, Hur EH, et al. Unique ethnic features of *DDX41* mutations in patients with idiopathic cytopenia of undetermined significance, myelodysplastic syndrome, or acute myeloid leukemia. *Haematologica* 2022;107:510-8.
6. Lewinsohn M, Brown AL, Weinel LM, et al. Novel germ line *DDX41* mutations define families with a lower age of MDS/AML onset and lymphoid malignancies. *Blood* 2016;127:1017-23.
7. Quesada AE, Routbort MJ, DiNardo CD, et al. *DDX41* mutations in myeloid neoplasms are associated with male gender, *TP53* mutations and high-risk disease. *Am J Hematol* 2019;94:757-66.
8. Greenberg PL, Tuechler H, Schanz J, et al. Revised international prognostic scoring system for myelodysplastic syndromes. *Blood* 2012;120:2454-65.
9. Bernard E, Tuechler H, Greenberg PL, et al. Molecular International Prognostic Scoring System for Myelodysplastic Syndromes. *NEJM Evid* 2022;1.
10. Bartlett JW, Hughes RA. Bootstrap inference for multiple imputation under uncongeniality and misspecification. *Stat Methods Med Res* 2020;29:3533-46.

# Supplemental Figure 1

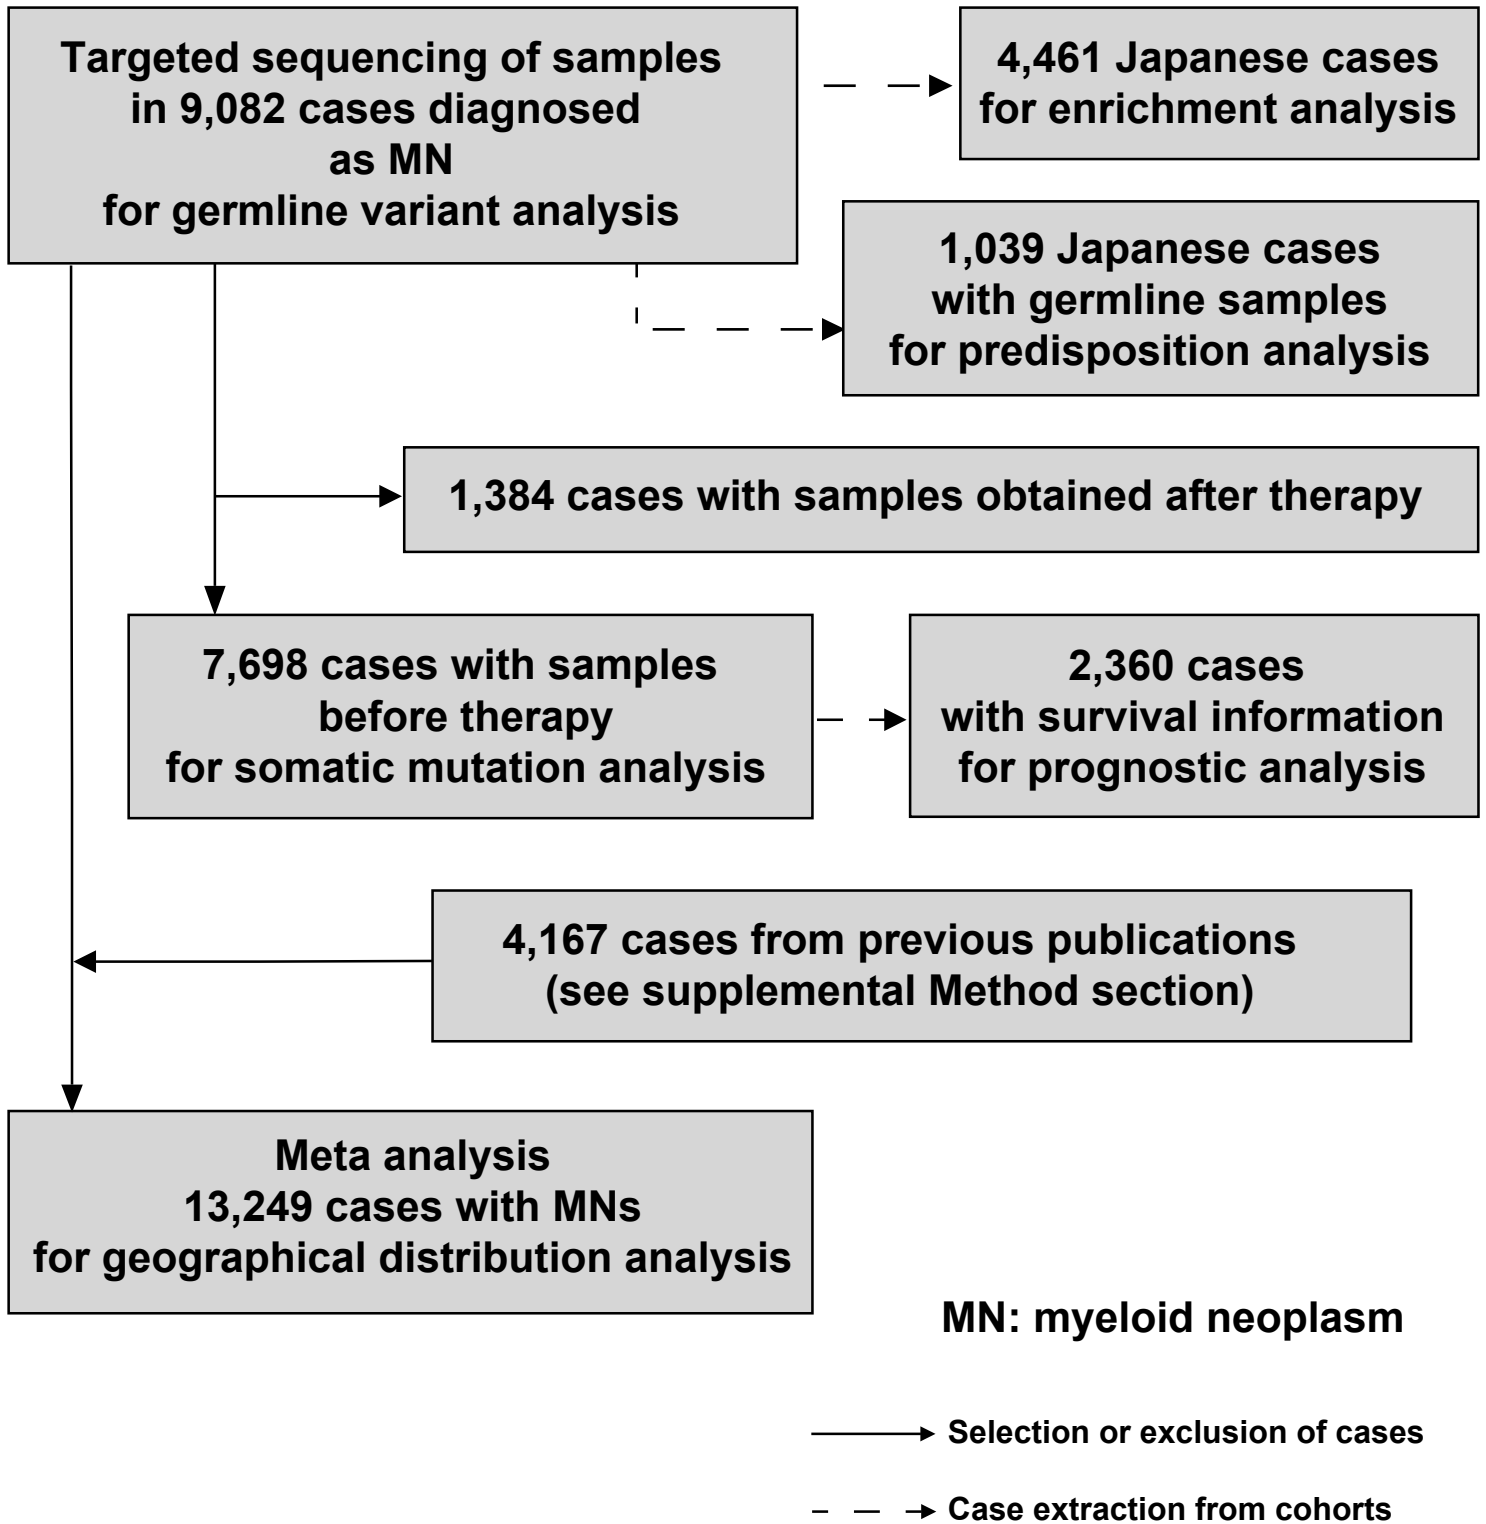

**Supplemental Figure 1. Study design, cases numbers, and the corresponding analyses.**

A flow diagram shows cohort information on availability of clinical parameters and selection of the cases for each analysis.

# Supplemental Figure 2

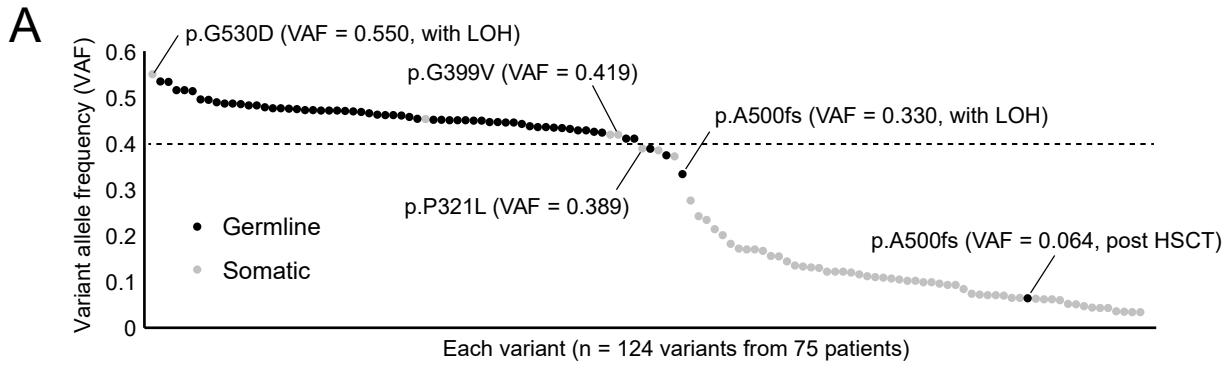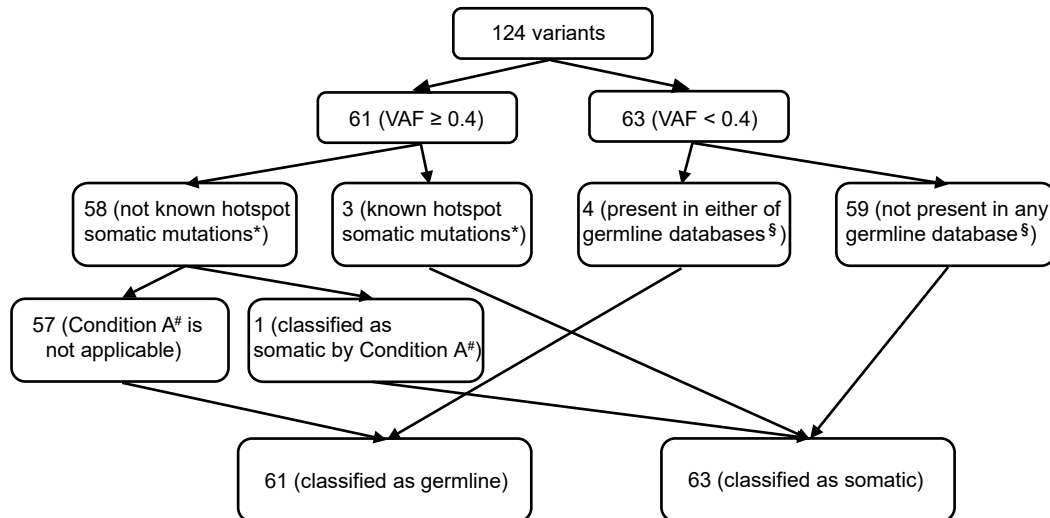

# Condition A: If two variants are classified as germline in a sample, further validation with germline control samples or serial samples is required. \*p.R525H, p.G530D, and p.G530S, § gnomAD database (v. 2.1.1) downloaded for *DDX41* on 4/30/2020, and germline variants previously confirmed by inhouse germline samples (p.P35R, p.S363del, p.V445del, and p.L553del).

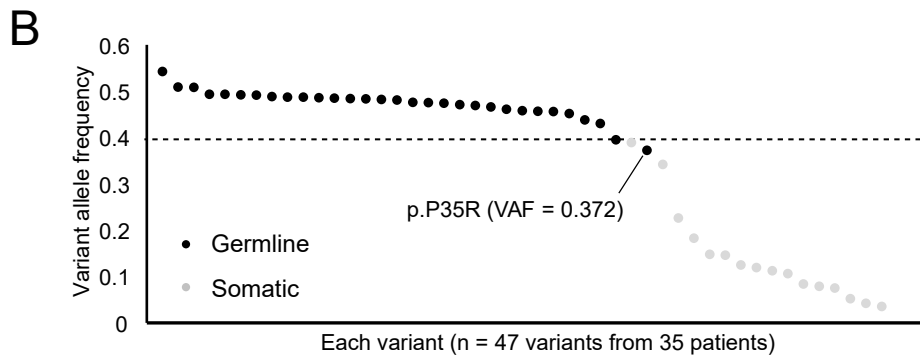

|              |          | Confirmation# |         |
|--------------|----------|---------------|---------|
|              |          | Germline      | Somatic |
| Prediction** | Germline | 31            | 0       |
|              | Somatic  | 0             | 16      |

\*\* Germline and somatic origins are predicted according to the criteria established in the panel **A**.

# Germline and somatic origins are confirmed using germline control samples.

## Supplemental Figure 2. Criteria for discriminating germline and somatic *DDX41* variants.

**A** The criteria used for classifying *DDX41* variants into germline and somatic variants was established based on the confirmed germline and somatic variants in training samples. **B** The criteria established in the training set (**A**) was validated in independent validation samples. VAF; Variant allele frequency, LOH; loss of heterozygosity, HSCT; hematopoietic stem cell transplantation.

## Supplemental Figure 3

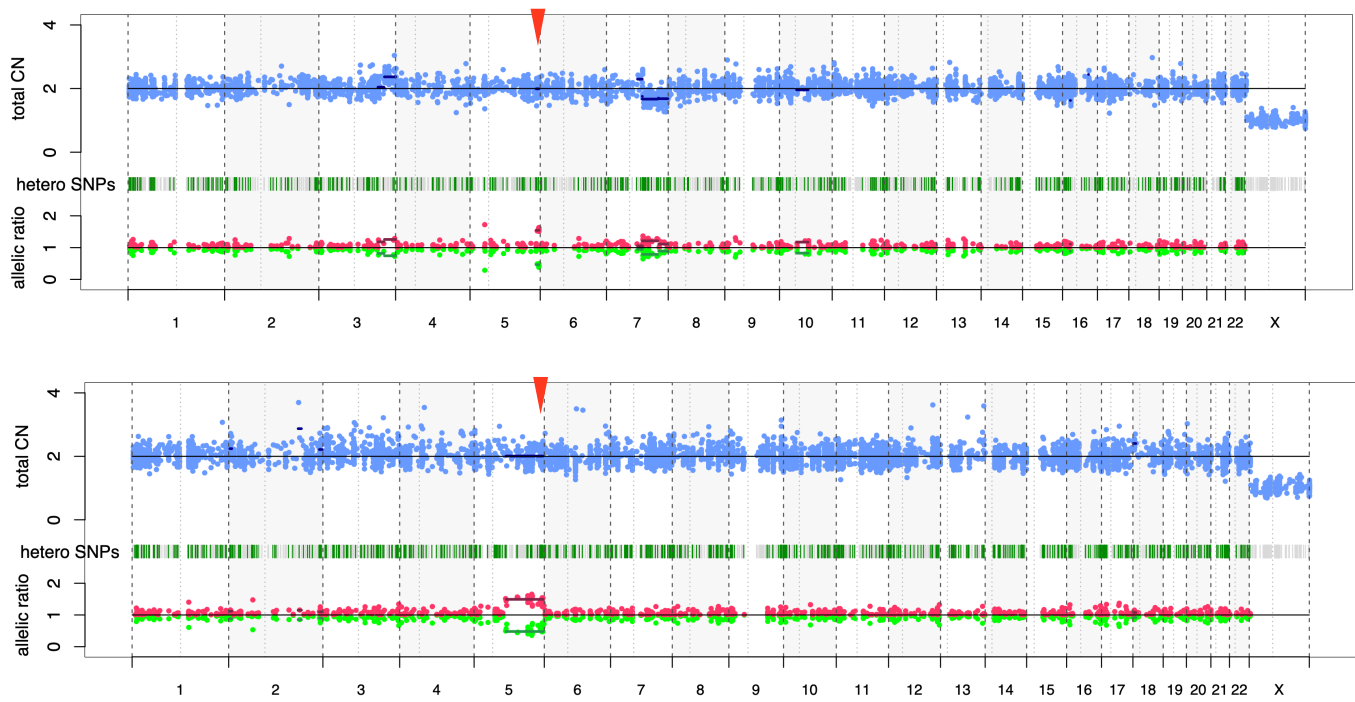

### Supplemental Figure 3. Uniparental disomy at the *DDX41* locus.

Copy-number profiles assessed by the sequence-based CNACS algorithm (Yoshizato *et al. Blood* 2017) in representative cases with somatic *DDX41* mutations and 5q uni-parental disomy (Red triangles). Blue dots indicate total copy numbers (total CN), while red and green ones indicate allele-specific copy numbers on heterozygous single nucleotide polymorphisms (SNPs).

## Supplemental Figure 4

| Gene                 | MDS<br>(n=430) | AML<br>(n=409) | MDS/MPN<br>(n=45) | MPN<br>(n=155) | Total<br>(n=1,039) |
|----------------------|----------------|----------------|-------------------|----------------|--------------------|
| <i>DDX41</i>         | 21             | 14             | 1                 | 0              | 36                 |
| <i>TP53</i>          | 2              | 1              | 0                 | 0              | 3                  |
| <i>SBDS</i>          | 0              | 2              | 0                 | 0              | 2                  |
| <i>GATA2</i>         | 2              | 0              | 0                 | 0              | 2                  |
| <i>RUNX1</i>         | 0              | 1              | 0                 | 0              | 1                  |
| <i>CHEK2</i>         | 1              | 0              | 0                 | 0              | 1                  |
| <i>SAMD9</i>         | 0              | 0              | 0                 | 0              | 0                  |
| <i>SAMD9L</i>        | 0              | 0              | 0                 | 0              | 0                  |
| <i>CEBPA</i>         | 0              | 0              | 0                 | 0              | 0                  |
| <i>ETV6</i>          | 0              | 0              | 0                 | 0              | 0                  |
| <i>ANKRD26</i>       | 0              | 0              | 0                 | 0              | 0                  |
| <i>RB1</i>           | 0              | 0              | 0                 | 0              | 0                  |
| <u><i>FANCL</i></u>  | 0              | 0              | 0                 | 0              | 0                  |
| <u><i>FANCD2</i></u> | 0              | 0              | 0                 | 0              | 0                  |
| <u><i>FANCE</i></u>  | 0              | 0              | 0                 | 0              | 0                  |
| <u><i>FANCG</i></u>  | 0              | 0              | 0                 | 0              | 0                  |
| <u><i>FANCC</i></u>  | 0              | 0              | 0                 | 0              | 0                  |
| <u><i>FANCF</i></u>  | 0              | 0              | 0                 | 0              | 0                  |
| <u><i>FANCM</i></u>  | 0              | 0              | 0                 | 0              | 0                  |
| <u><i>FANCI</i></u>  | 0              | 0              | 0                 | 0              | 0                  |
| <u><i>FANCA</i></u>  | 0              | 0              | 0                 | 0              | 0                  |
| <u><i>FANCB</i></u>  | 0              | 0              | 0                 | 0              | 0                  |
| <u><i>BRCA2</i></u>  | 0              | 0              | 0                 | 0              | 0                  |

### Supplemental Figure 4. Germline predisposition in Japanese cases with MNs.

Frequencies of pathogenic variants in 23 genes previously implicated in germline predisposition of MNs (also shown in **Figure 1E**). In the underlined genes, only homozygous/compound heterozygous cases were counted.

# Supplemental Figure 5

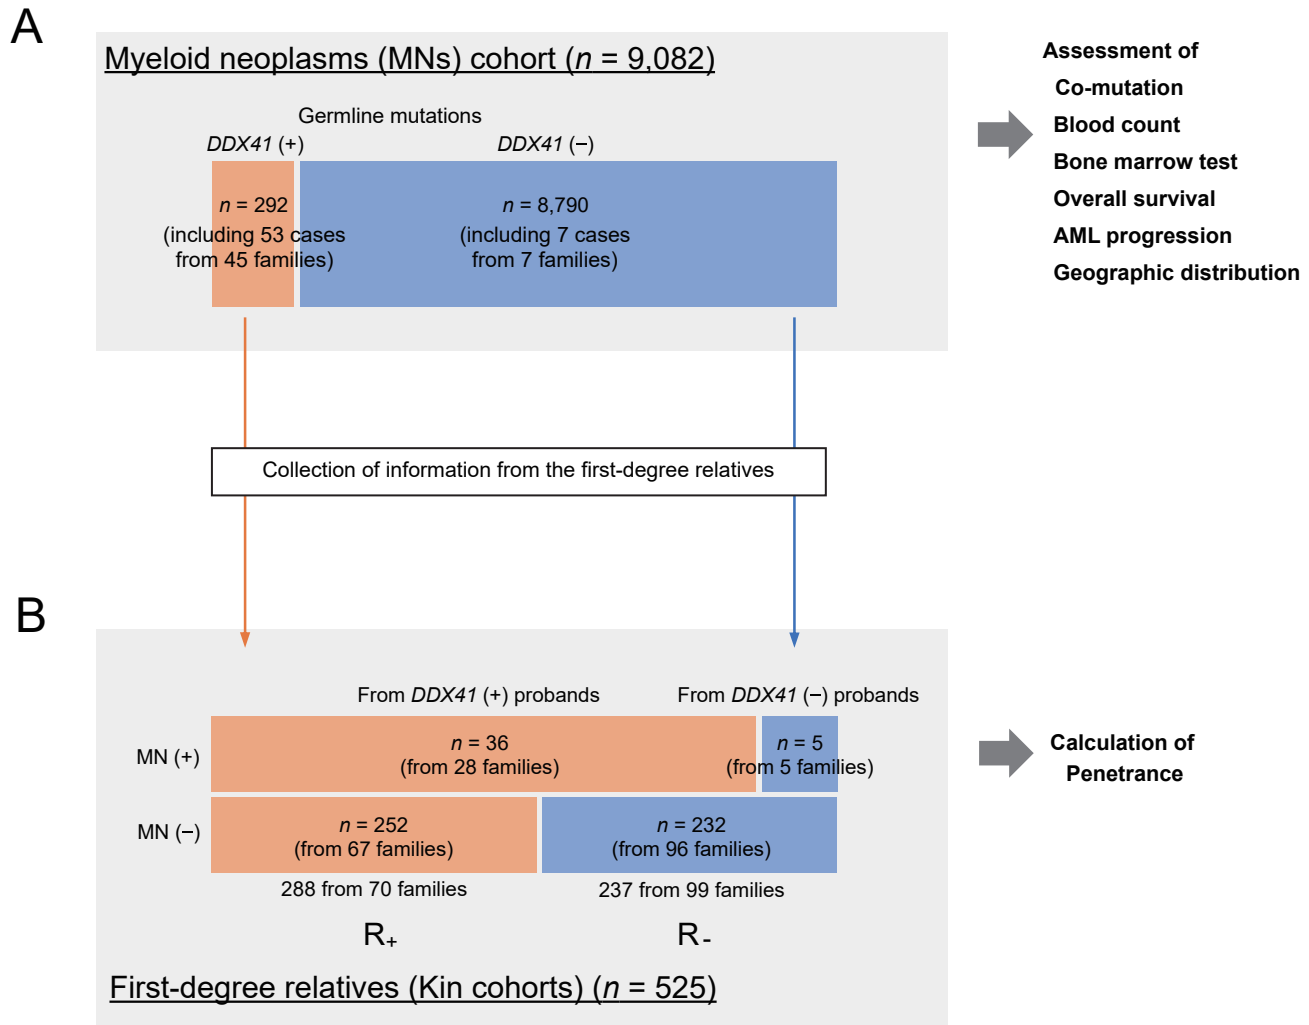

## Supplemental Figure 5. Family history and genotype in patients and their first-degree relatives enrolled in this study.

Cases with myeloid neoplasms (MNs) (**A**: MNs cohort) were analyzed for assessment of various genetic and clinical parameters as indicated. After MN cases were subdivided into those with (orange) and without (blue) germline *DDX41* mutations, information related to ages at disease onset and death was collected from their first-degree relatives (parents, siblings, and children) (**B**: Kin cohorts). The kin cohorts were used for calculating the cumulative incidence of disease (R) in the first-degree relatives of MN cases with (R+) and without (R-) germline *DDX41* mutations. Penetrance was calculated by  $2R^+ - R^-$  as previously reported (Struwing *et al. N Eng J Med* 1997).

# Supplemental Figure 6

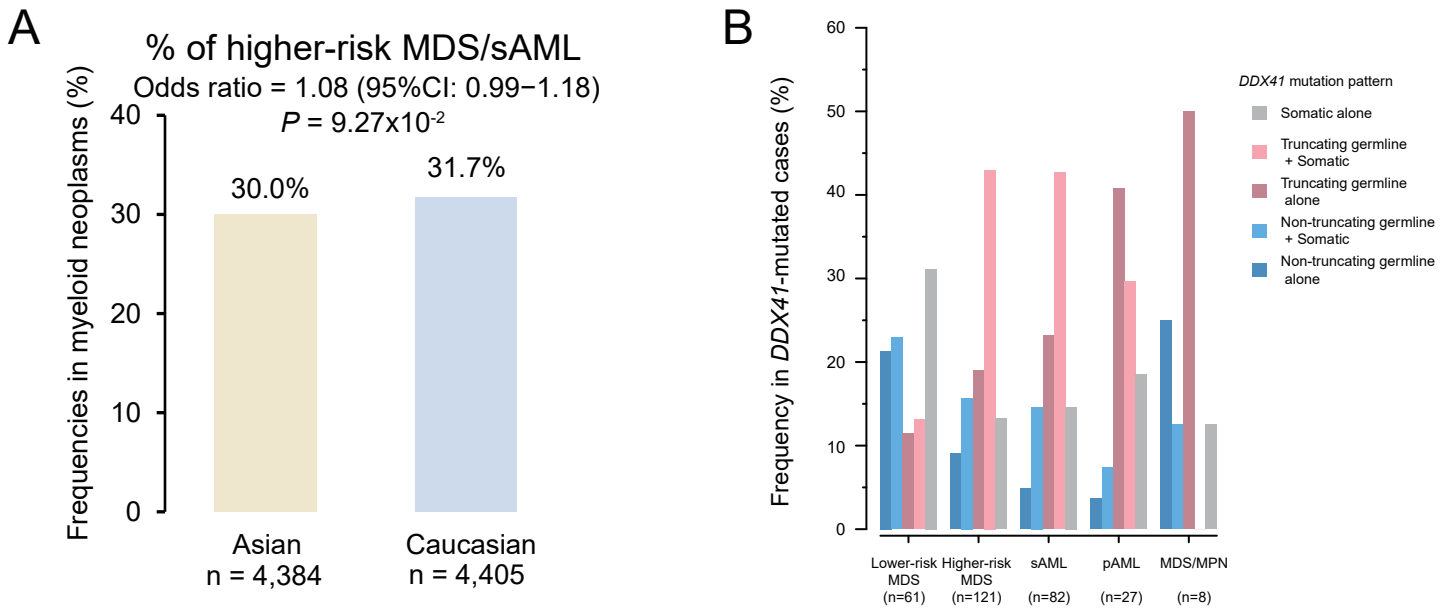

**Supplemental Figure 6. Frequency of *DDX41*-associated-disease phenotypes and disease-specific frequencies of *DDX41* variants.**

**A** Similar frequencies of most prevalent disease subtypes associated with *DDX41* mutations (higher-risk MDS and sAML) between Asian and Caucasian patients enrolled in this study. **B** Frequencies of cases with various allelic status of *DDX41* mutations in each disease subtype.



# Supplemental Figure 7

**A**

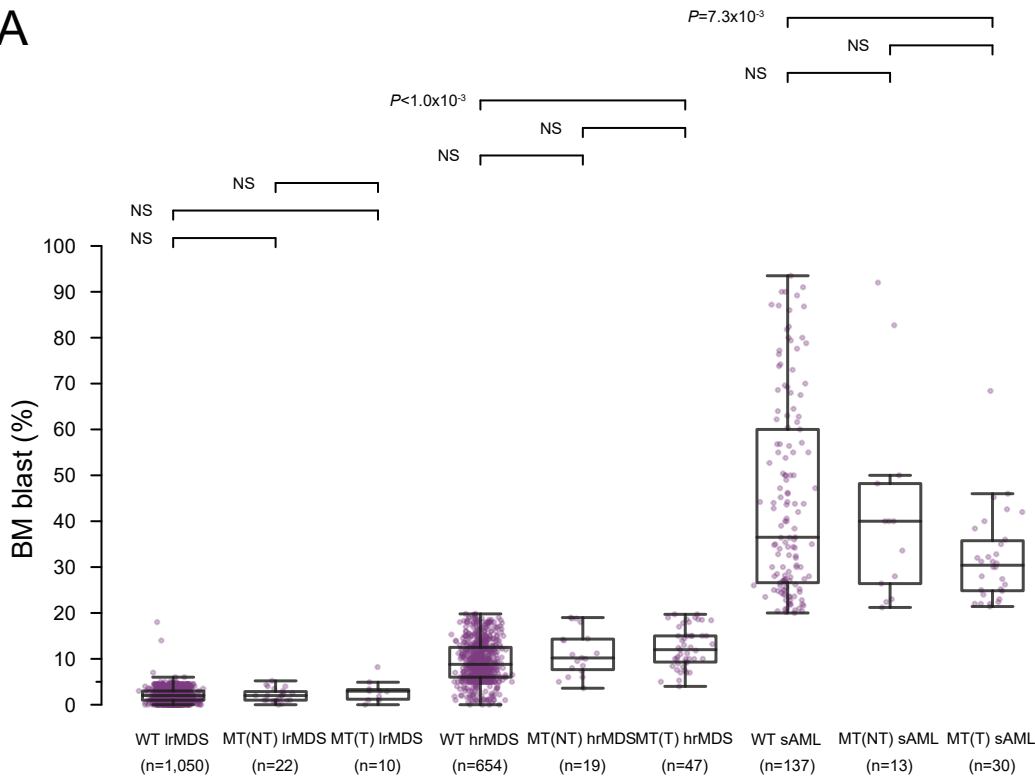

**B**

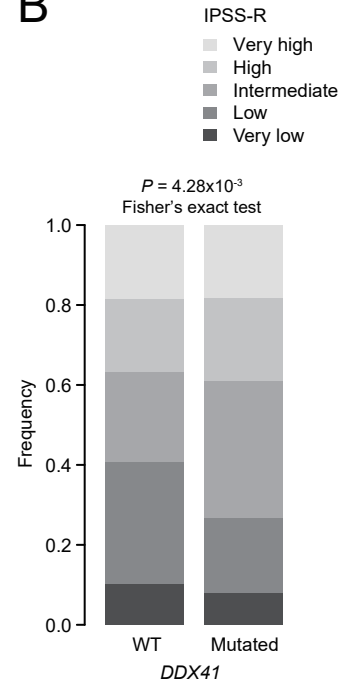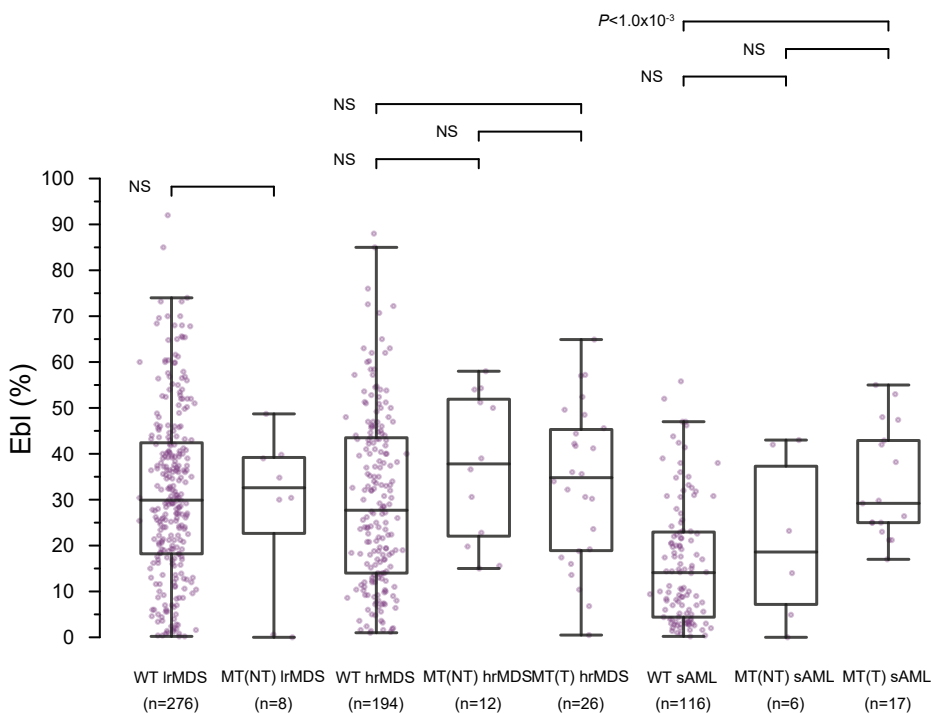

**Supplemental Figure 7. Bone marrow cell counts of MN patients depending on the type and state of *DDX41* alleles, and IPSS-R in *DDX41*-WT and mutated patients.**

**A** Percentages of bone marrow (BM) blasts (Upper panel) and erythroblasts (Ebl) (Lower panel) were compared among patients with wild-type (WT) *DDX41*, and non-truncating (NT) and truncating (T) *DDX41* mutations (MT) in the disease subtypes as indicated: lower-risk (lr) MDS, higher-risk (hr) MDS, and secondary (s) AML. **B** Ratio of *DDX41*-unmutated and mutated patients with categories of the Revised international prognostic scoring system (IPSS-R). NS, not significant.

# Supplemental Figure 8

**A**

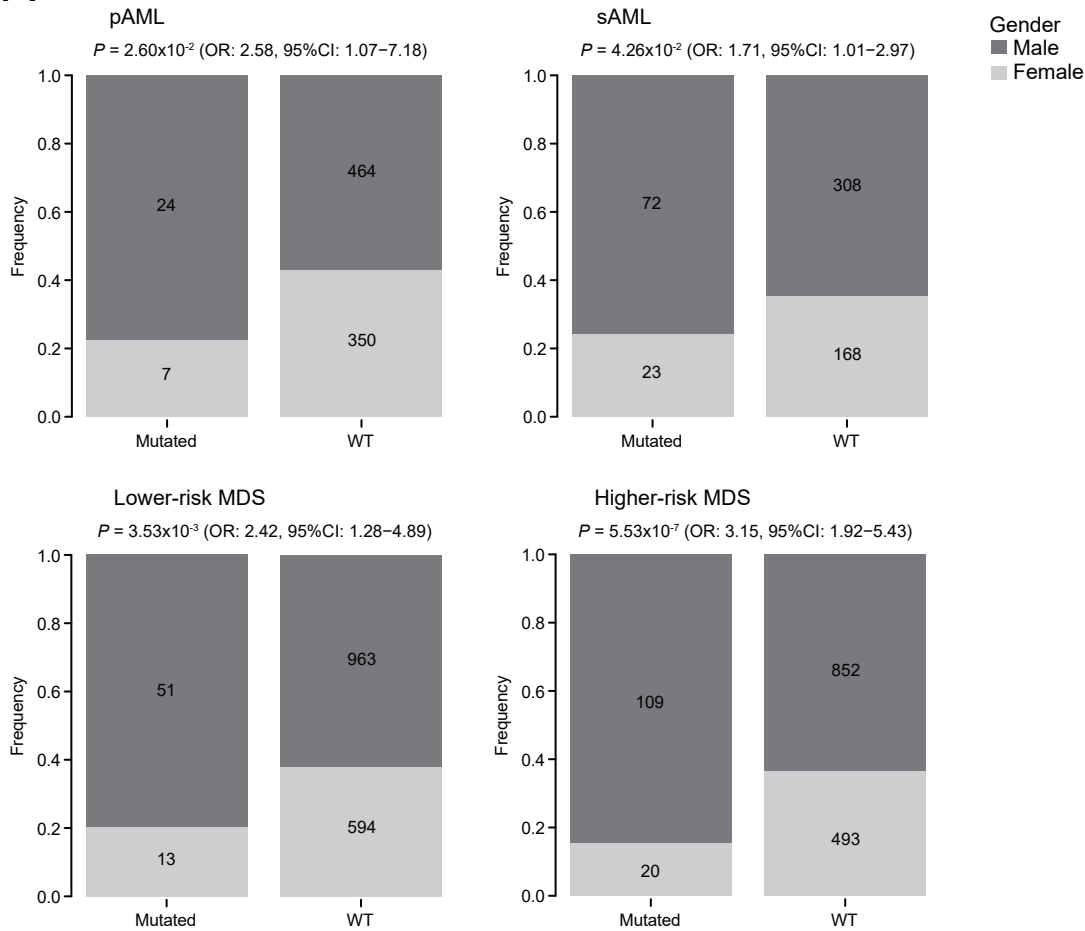

**B**

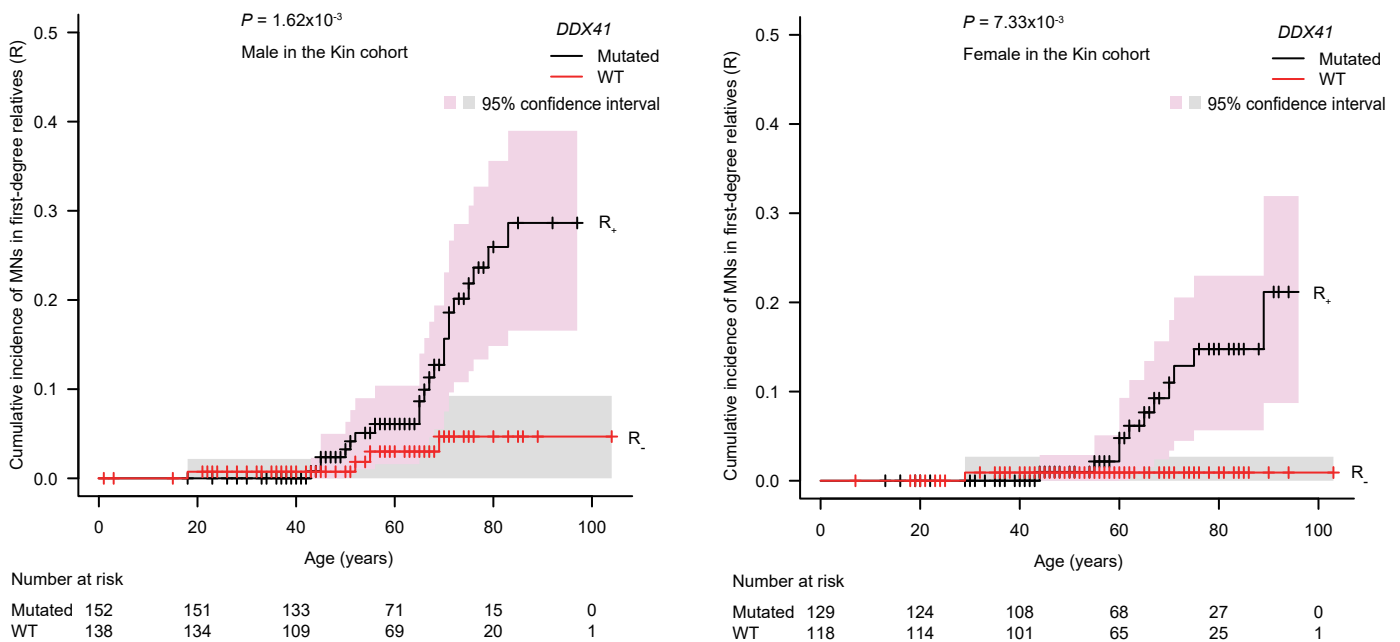

**Supplemental Figure 8. Male dominance in *DDX41*-mutated patients.**

**A** Odds ratios of male vs. female patients between *DDX41*-mutated and wild-type (WT) patients and corresponding *P* values were calculated by Fisher's exact test in each disease subtype. **B** Cumulative incidence of myeloid neoplasms (MNs) calculated by Fine-Gray test of ages at disease onset and death in the first-degree relatives of MN cases with (red) or without (black) P/LP germline *DDX41* variants (Left; male, Right; female).

# Supplemental Figure 9

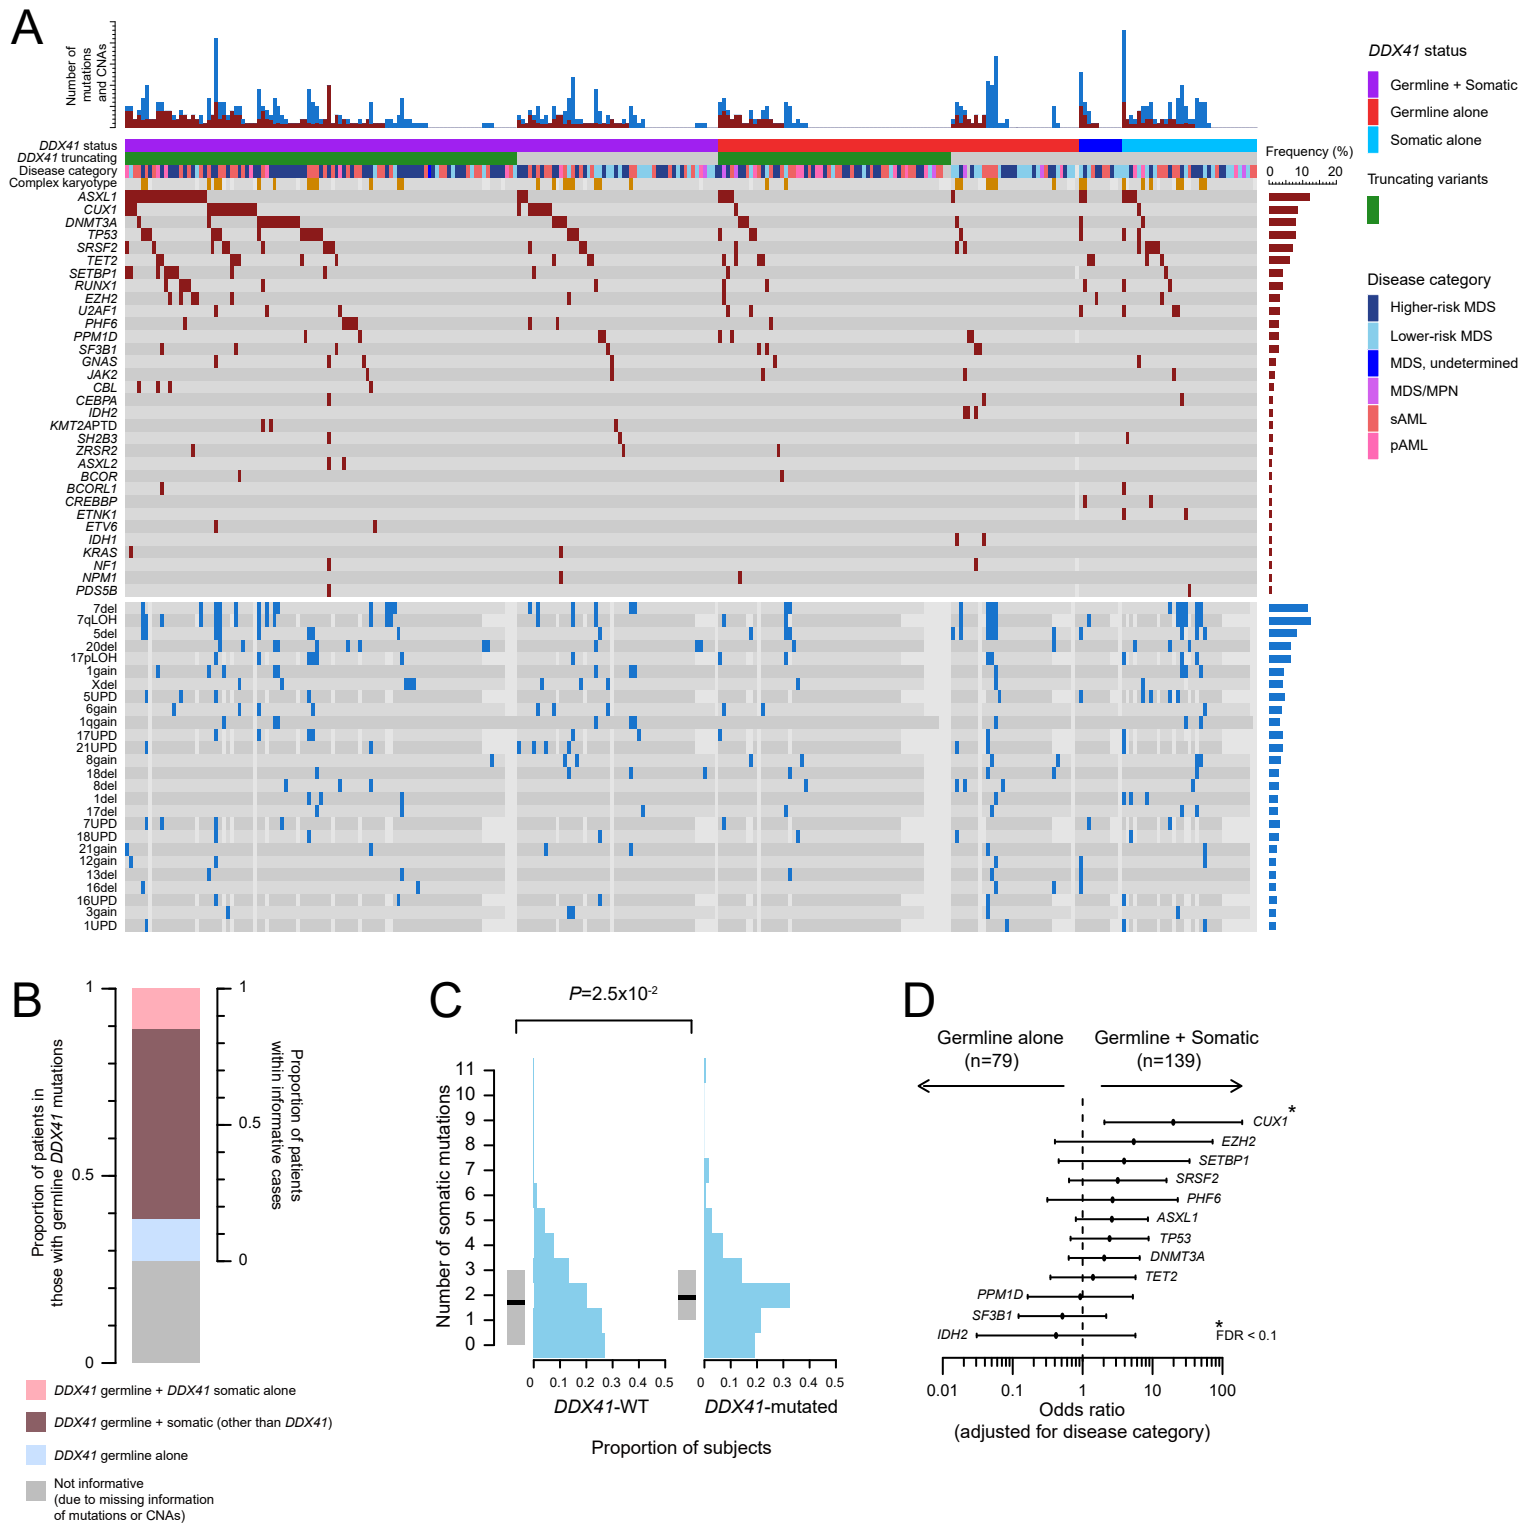

**Supplemental Figure 9. Landscape of somatic alterations in *DDX41*-mutated patients.**

**A** Profiles of somatic mutations and copy number alterations (CNAs) in *DDX41*-mutated myeloid neoplasms (MNs) (n=294). Cases are ordered according to *DDX41* mutation status and disease categories as indicated by colors. Somatic mutations and CNAs are shown in dark red and blue, respectively. Dark and light grays indicate negative results for somatic mutations/CNAs and uninformative results, respectively. The top bar plot shows the number of somatic mutations and CNAs in each case. The right-sided bars demonstrate frequencies of mutations and CNAs for each genetic alteration. **B** Among MN patients with germline *DDX41* variants, proportions of those with somatic *DDX41* mutations, with somatic driver mutations in the genes other than *DDX41*, and without any somatic driver mutations are shown. **C** Distributions of the number of somatic driver mutations in *DDX41*-mutated and -WT MNs. Somatic *DDX41* mutations are included in the analysis as driver mutations. Black bars indicate the mean number of somatic mutations. Gray rectangles show the intervals between the 1st and 3rd quantiles. Statistical significance was tested by two-sided Wilcoxon test. **D** Comparison of frequencies of mutations between MNs with *DDX41* germline and somatic mutations and those with germline mutation(s) alone. Odds ratios were calculated in multivariate logistic regressions adjusted for disease categories. Error bars indicate 95% confidence intervals. Statistical significance was examined by two-sided Wald test.

# Supplemental Figure 10

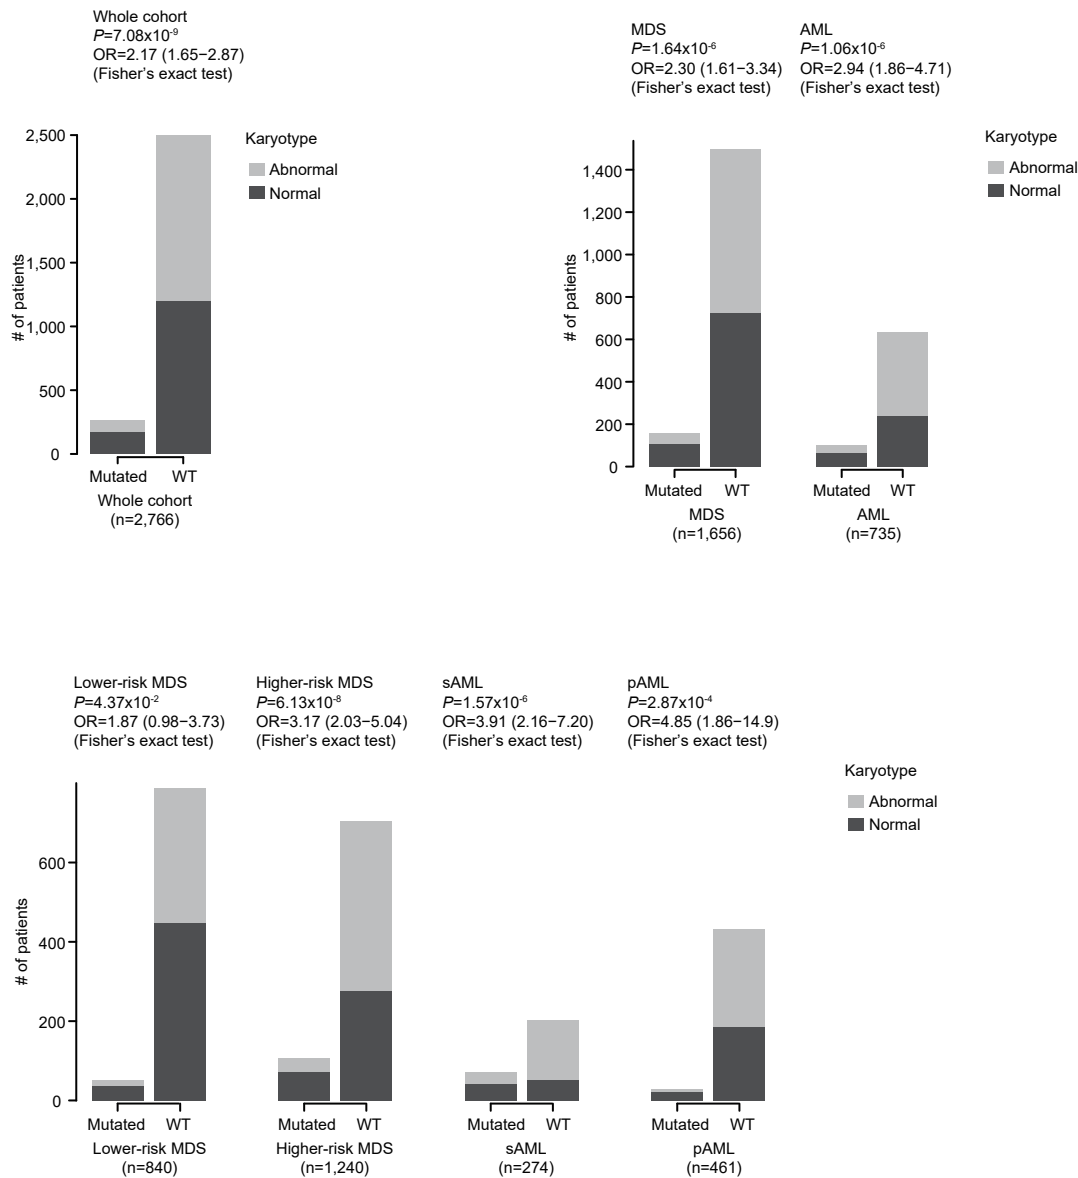

**Supplemental Figure 10. Frequent normal karyotype in *DDX41*-mutated patients.**

Odds ratios of normal vs. abnormal karyotypes between *DDX41*-mutated and wild-type (WT) patients and corresponding *P* values were calculated by Fisher's exact test in each disease subtype.

# Supplemental Figure 11

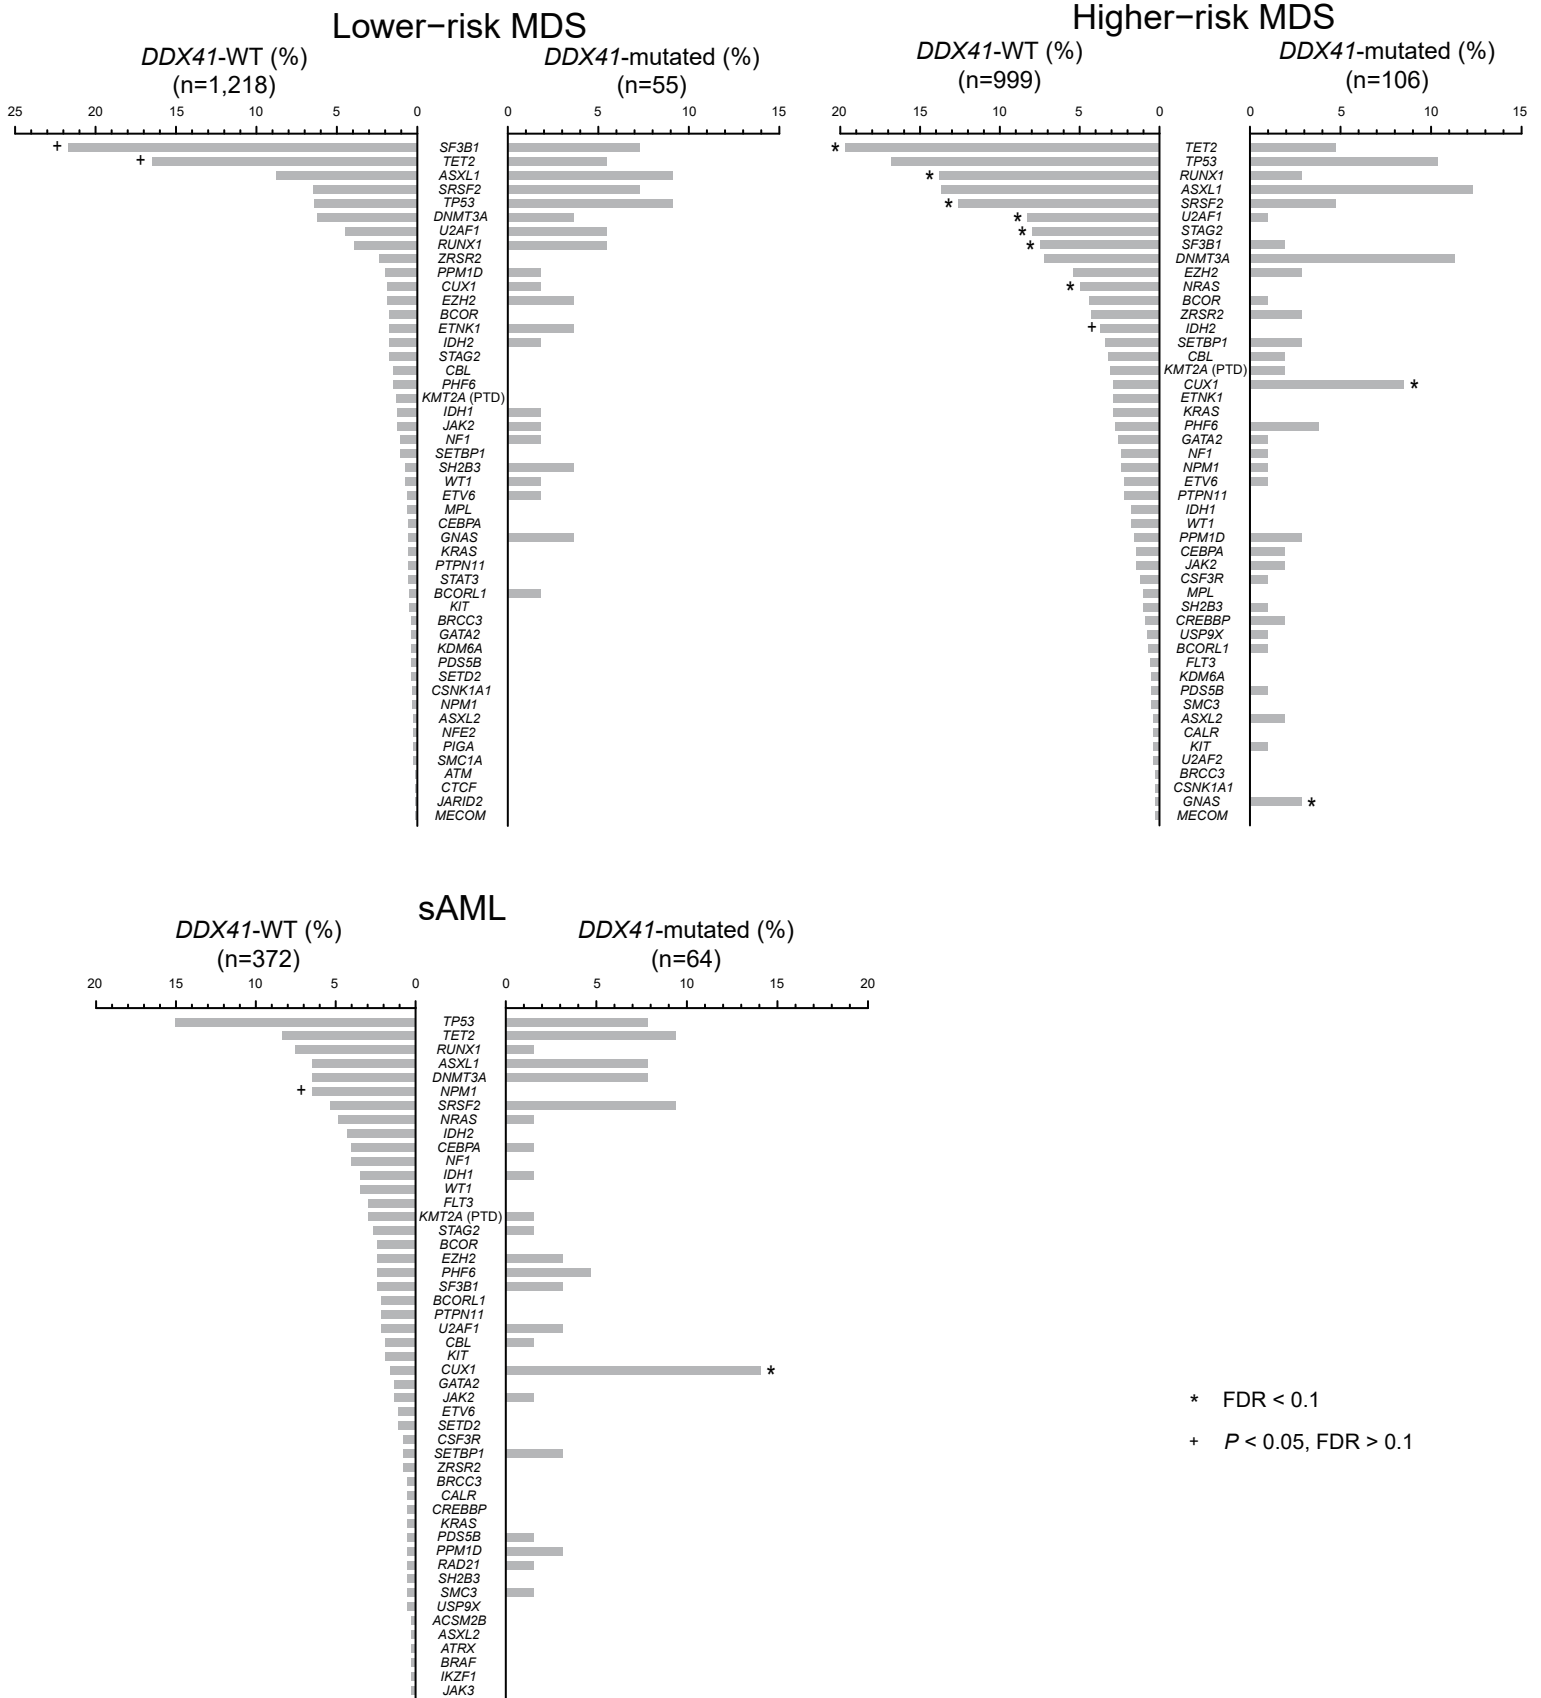

**Supplemental Figure 11. Co-mutations in *DDX41*-mutated patients.**

Comparison of mutation frequencies between *DDX41*-mutated or -WT cases in lower-risk MDS, higher-risk MDS, and sAML. Statistical significance was examined by two-sided Fisher exact test. False discovery rates (FDR) were calculated by Benjamini & Hochberg methods.

# Supplemental Figure 12

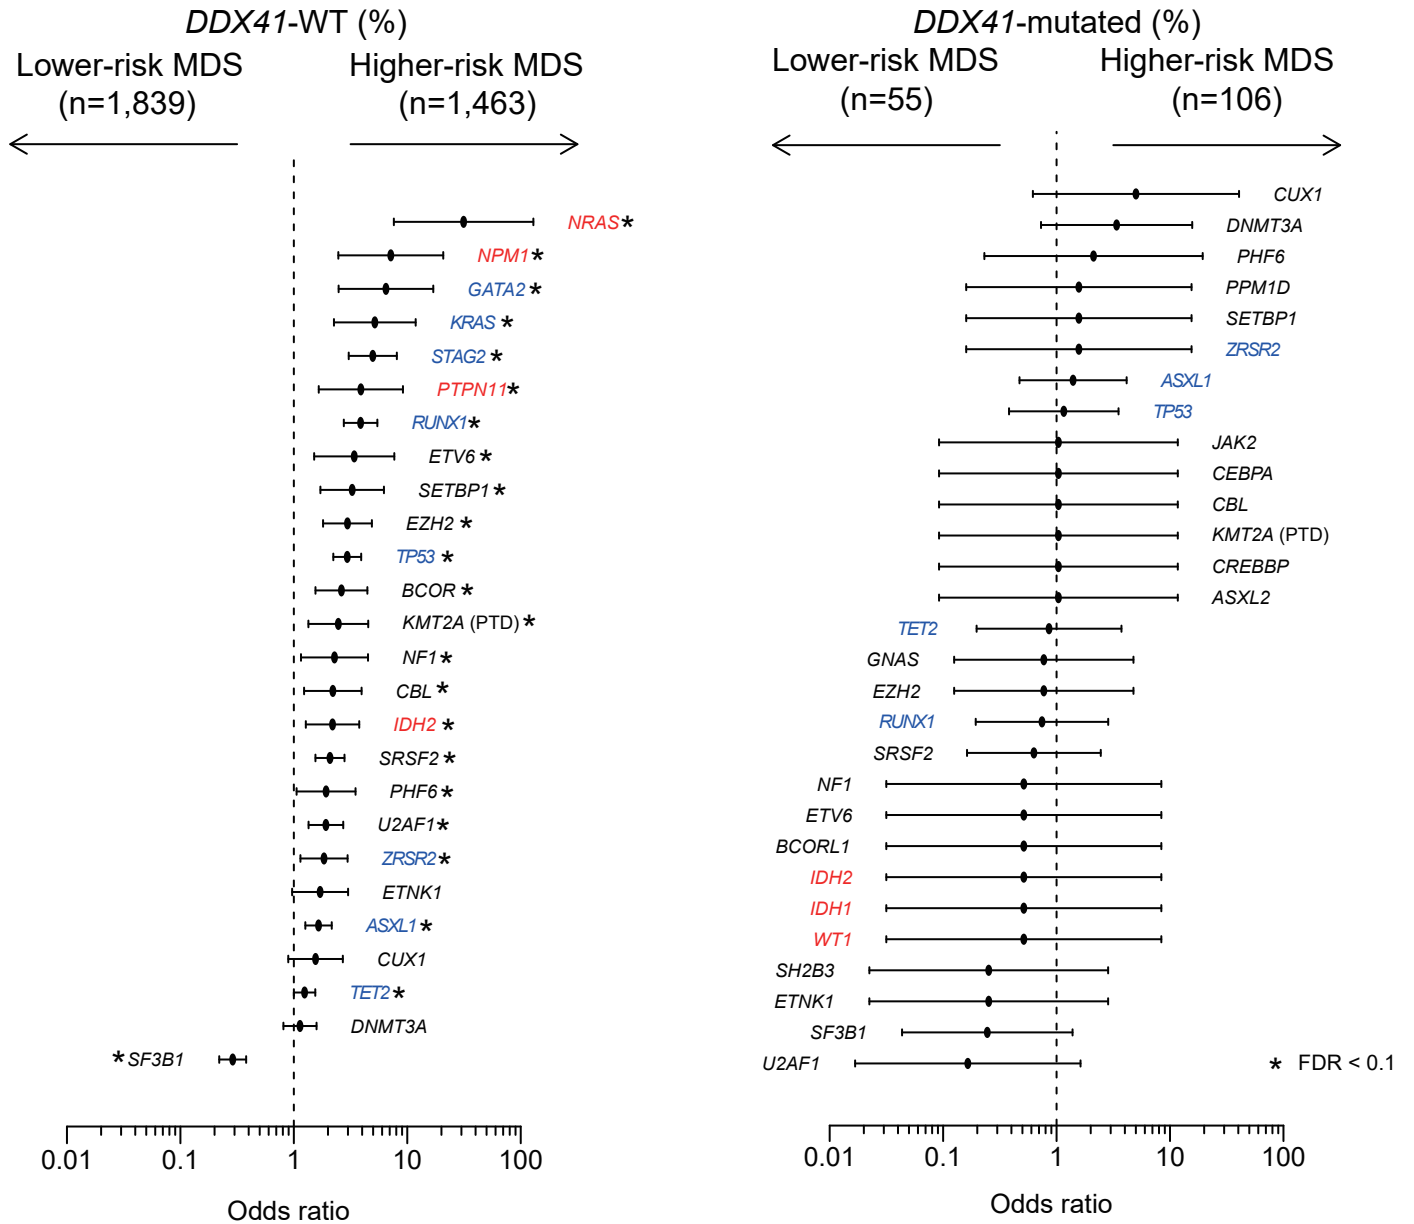

## Supplemental Figure 12. Comparison of mutation frequencies between lower-risk and higher-risk MDS.

The frequencies of driver mutations were compared between lower-risk MDS and higher-risk MDS. Odds ratios in *DDX41*-mutated and -WT cases are shown separately, and error bars indicate 95% confidence intervals. Type-1 (*FLT3*, *NRAS*, *WT1*, *NPM1*, *IDH1*, *IDH2*, and *PTPN11*) and Type-2 (*GATA2*, *KRAS*, *TP53*, *RUNX1*, *STAG2*, *ASXL1*, *ZRSR2*, and *TET2*) genes, as defined according to the previous publication (Makishima *et al. Nat Genet* 2017), are indicated by red and blue characters, respectively.

# Supplemental Figure 13

## DDX41-mutated cases

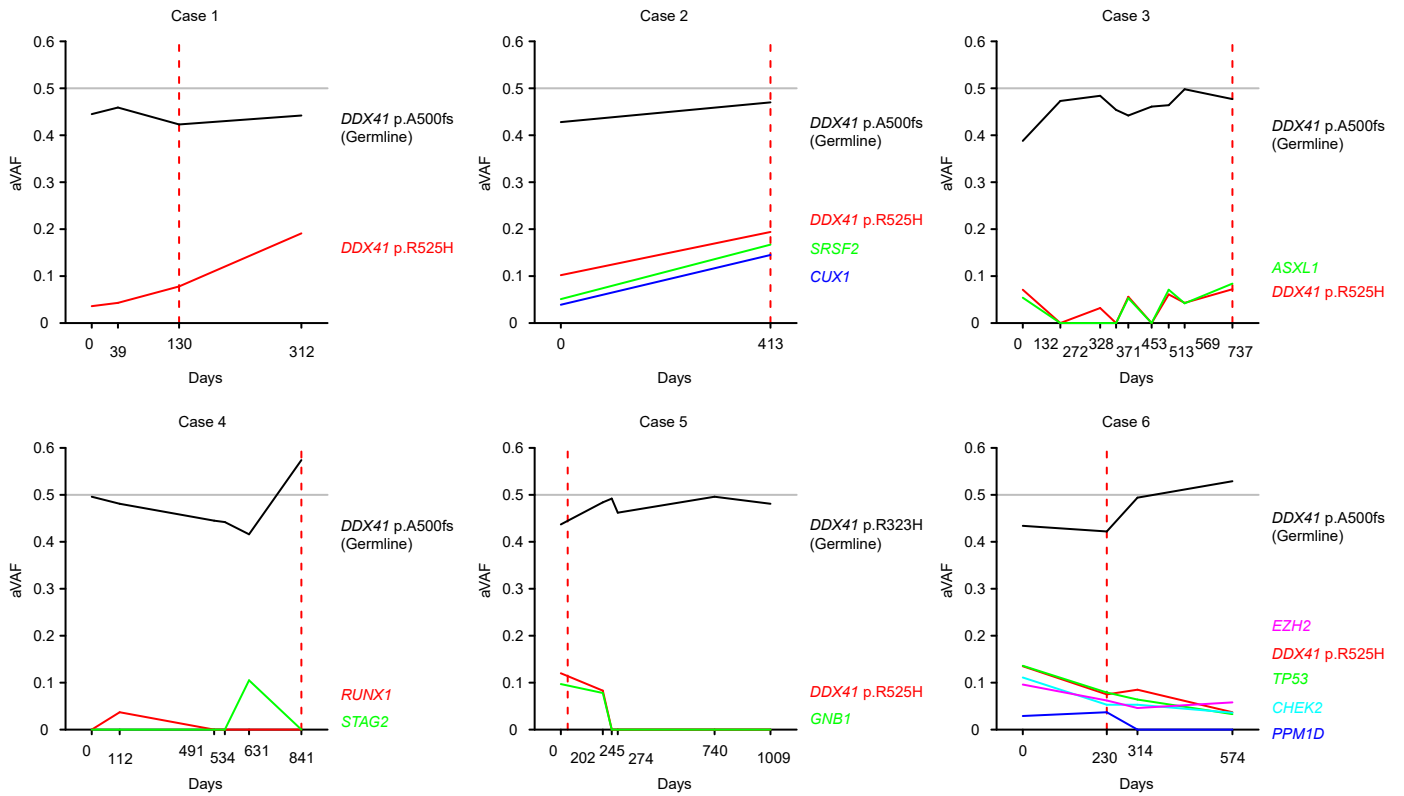

## DDX41-WT cases

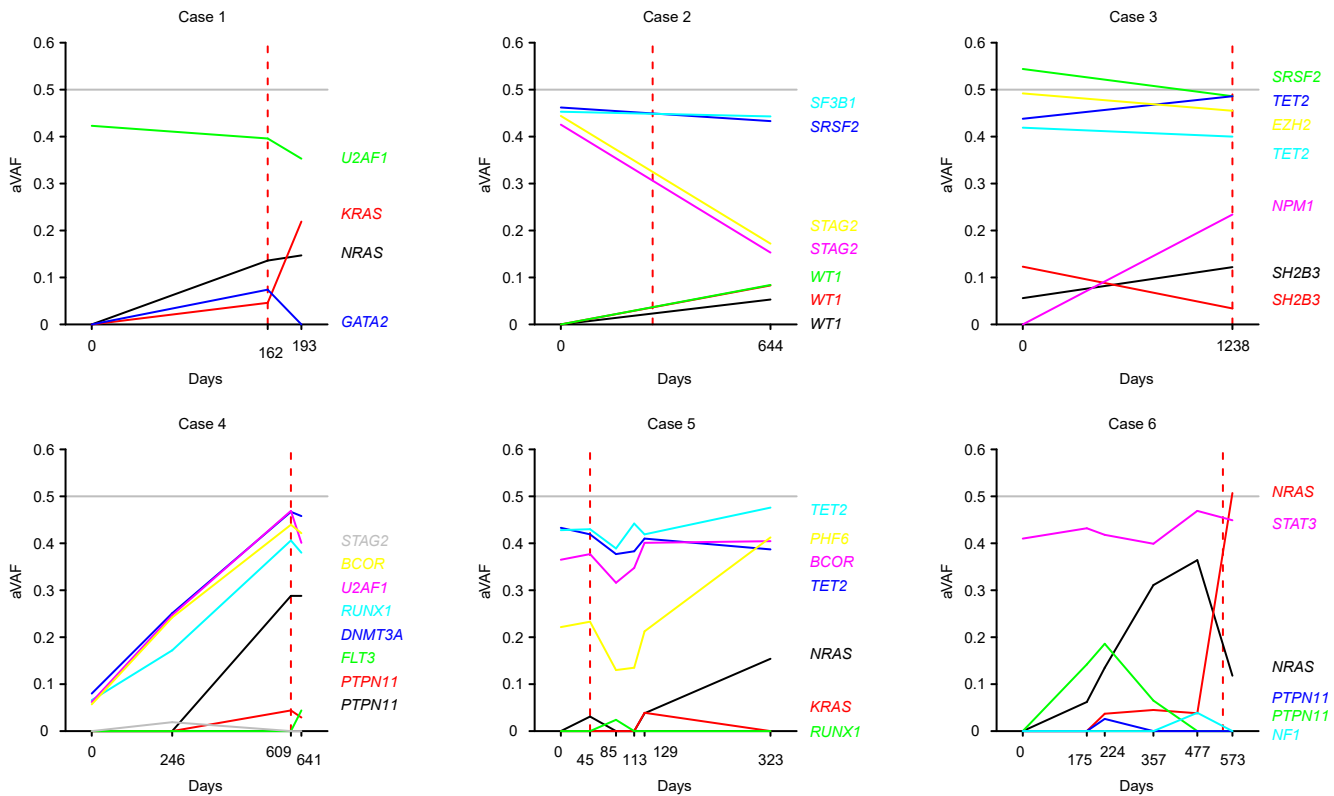

### Supplemental Figure 13. Clonal dynamics during leukemic progression in *DDX41*-mutated and -WT patients.

Transition of adjusted variant allelic frequencies (aVAFs) of somatic mutations during leukemic progressions in 6 *DDX41*-mutated and 6 -WT MNs are shown. aVAFs of P/LP germline *DDX41* variants are also shown in black. The times of leukemic progressions are indicated by red dashed lines.

## Supplemental Figure 14

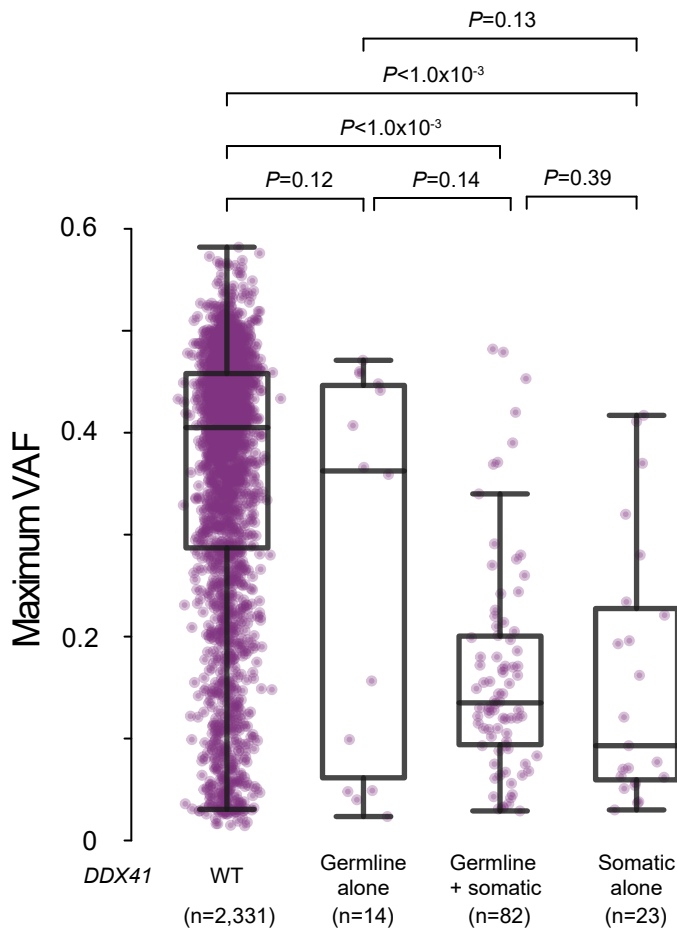

### Supplemental Figure 14. Distributions of maximum variant allele frequency of somatic mutations.

Maximum VAF values for individual patients (adjusted by CNAs) of somatic mutations in driver genes including *DDX41* are shown. Box plots indicate the median, first, and third quartiles (Q1 and Q3) and whiskers extend to the furthest value between  $Q1 - 1.5 \times \text{IQR}$  and  $Q3 + 1.5 \times \text{IQR}$ . Purple dots represent individual patients. Differences between groups (*DDX41* WT, germline mutation alone, germline and somatic mutations (two-hit), and somatic mutation(s) alone) were examined by two-sided Wilcoxon test. *P* values were not adjusted for multiple testing.



# Supplemental Figure 15

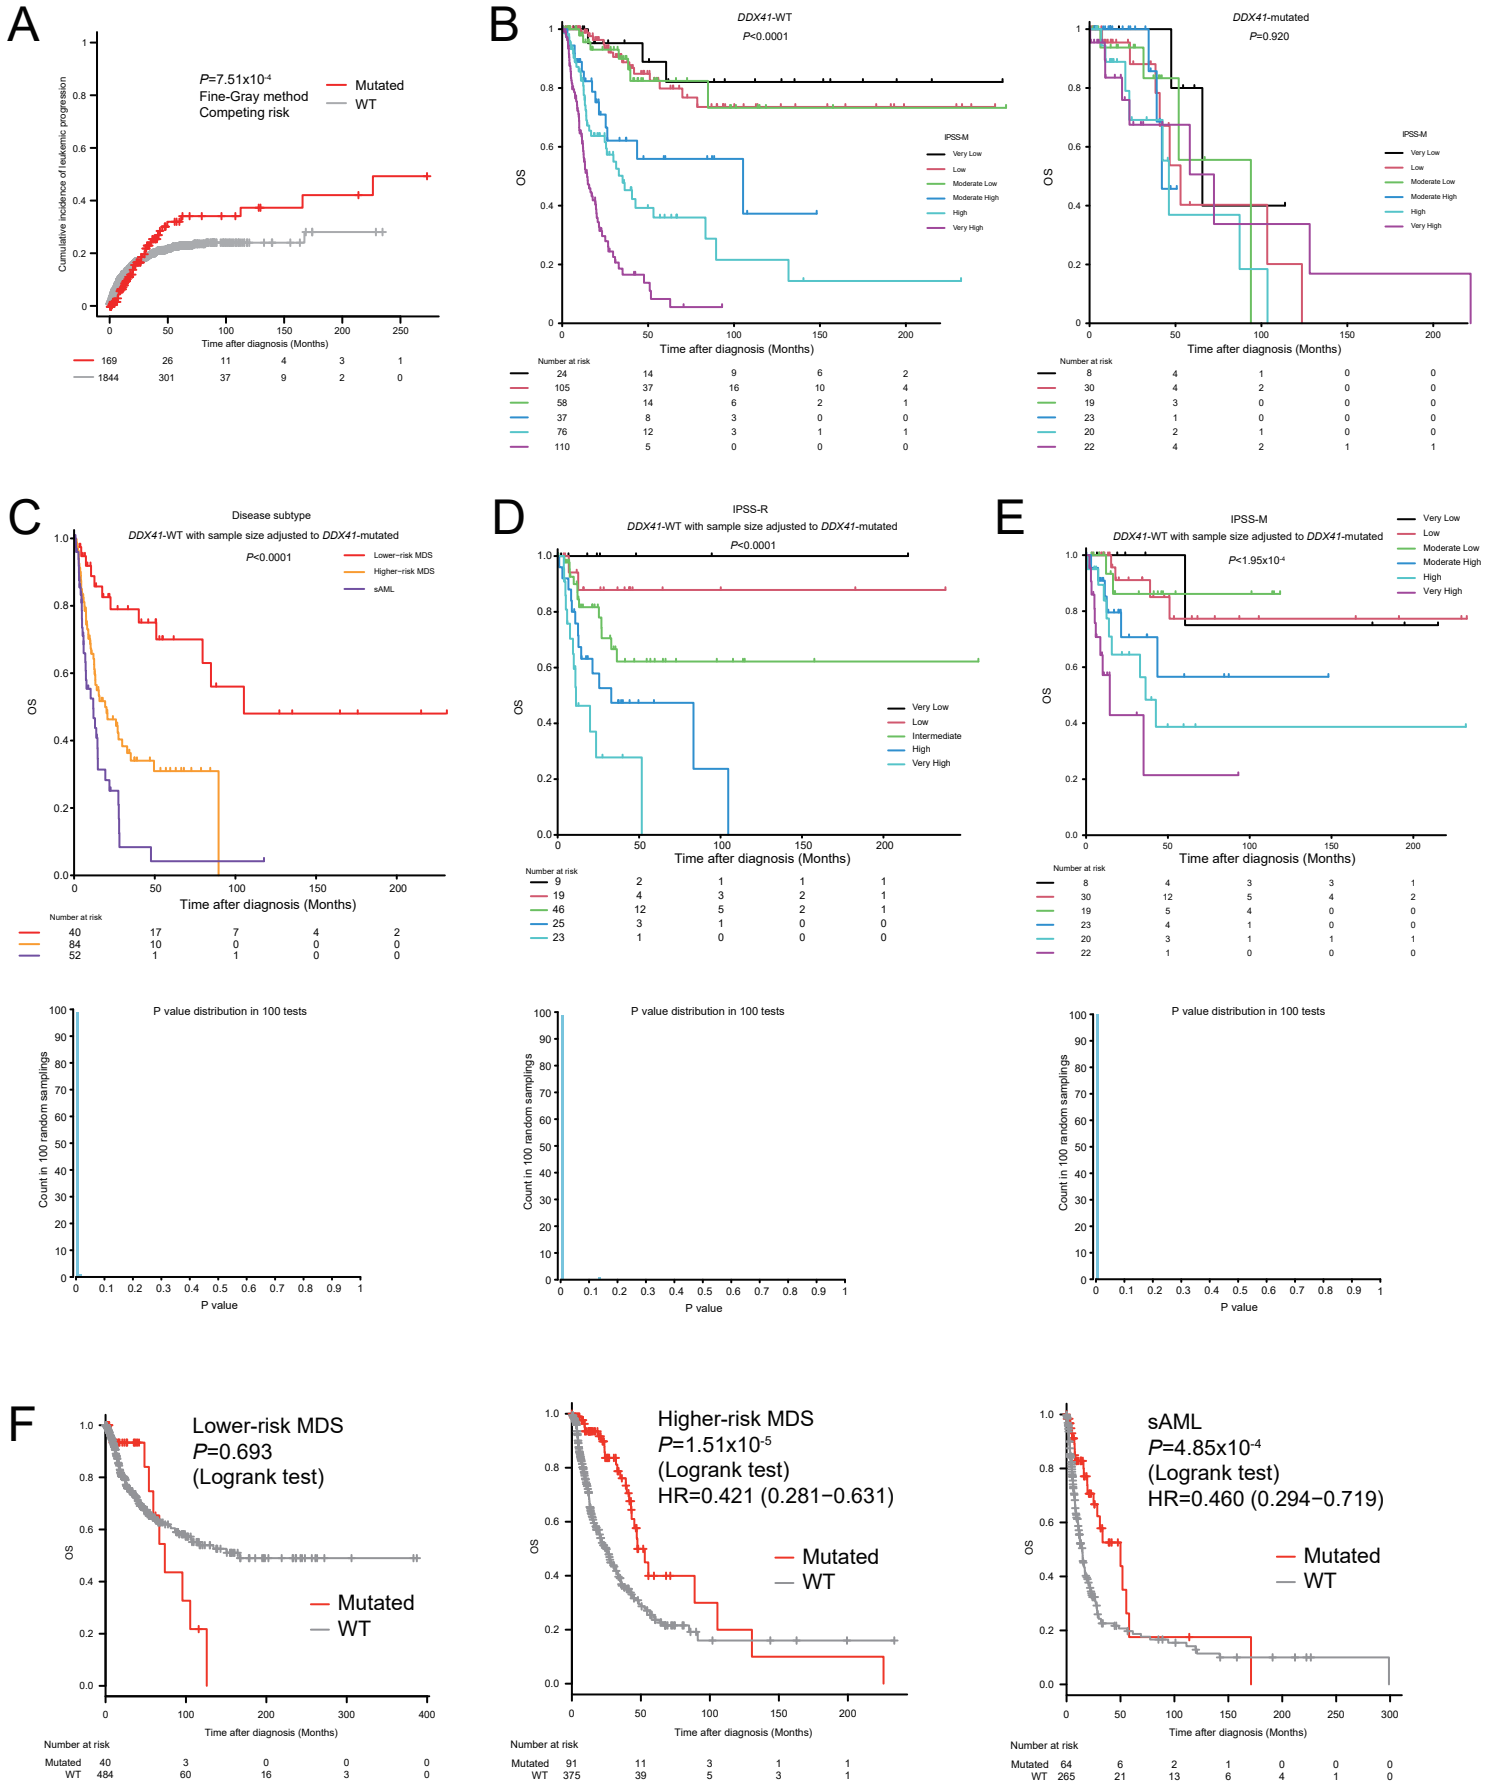

## Supplemental Figure 15. Impacts of *DDX41* mutations on leukemic evolution and overall survival (OS).

**A** Cumulative incidence of leukemic progression in *DDX41*-mutated and -unmutated myeloid neoplasms (MNs) was estimated by Fine-Gray method with non-leukemic death as a competing risk. **B** Kaplan-Meier curves of overall survivals (OS) for *DDX41*-mutated or -WT MNs were shown in each IPSS-M category. **C–E** Kaplan-Meier curves of OS for randomly selected WT MNs with adjusted sample size to mutated ones (upper panels) and the distribution of P-values calculated by logrank tests of the adjusted WT MNs randomly selected 100 times (lower panels). **C**, **D**, **E** show the results of analysis for disease subtype, IPSS-R, and IPSS-M, respectively. **F** Kaplan-Meier curves of OS for *DDX41*-mutated or -WT MNs were shown in each disease subtype. Statistical significance was tested by two-sided Log-rank test. The observations were censored at hematopoietic stem-cell transplantation.

# Supplemental Figure 16

HMA treatments

*DDX41*

— Mutated  
— WT

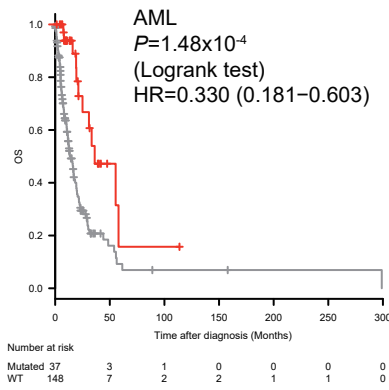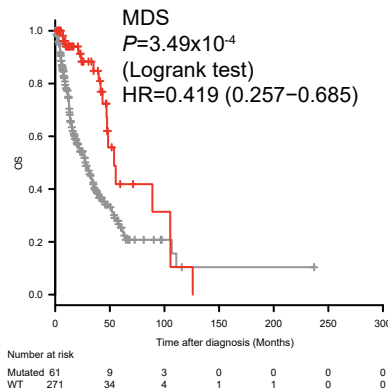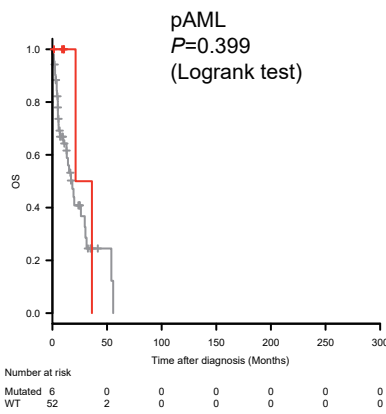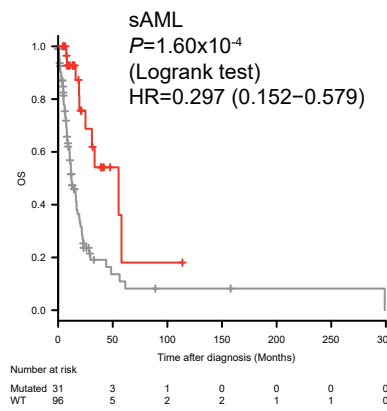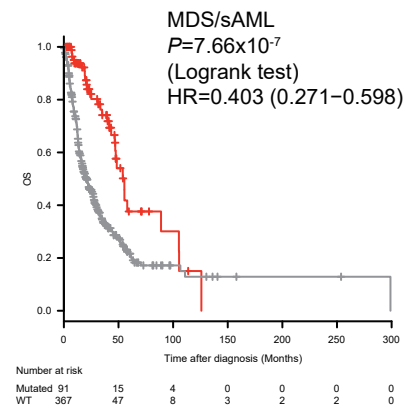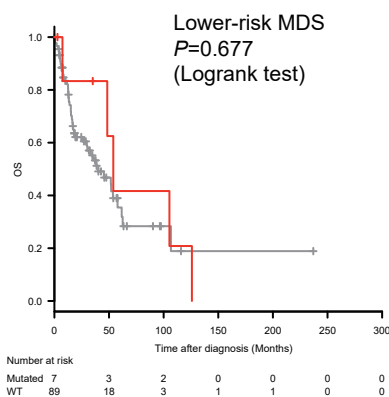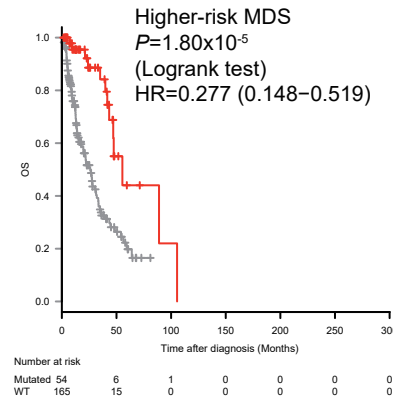

**Supplemental Figure 16. Prognostic impacts of *DDX41* mutations in the cohort with hypomethylating agent (HMA) treatment.**

Kaplan-Meier curves of overall survivals (OS) for *DDX41*-mutated or -WT myeloid neoplasms (MNs) with hypomethylating agent (HMA) treatment were shown in each disease subtype. Statistical significance was tested by two-sided Log-rank test. Hazard ratios and 95% confidence intervals were calculated by Cox proportional hazard regression. The observations were censored at hematopoietic stem-cell transplantation.

# Supplemental Figure 17

## Chemotherapy

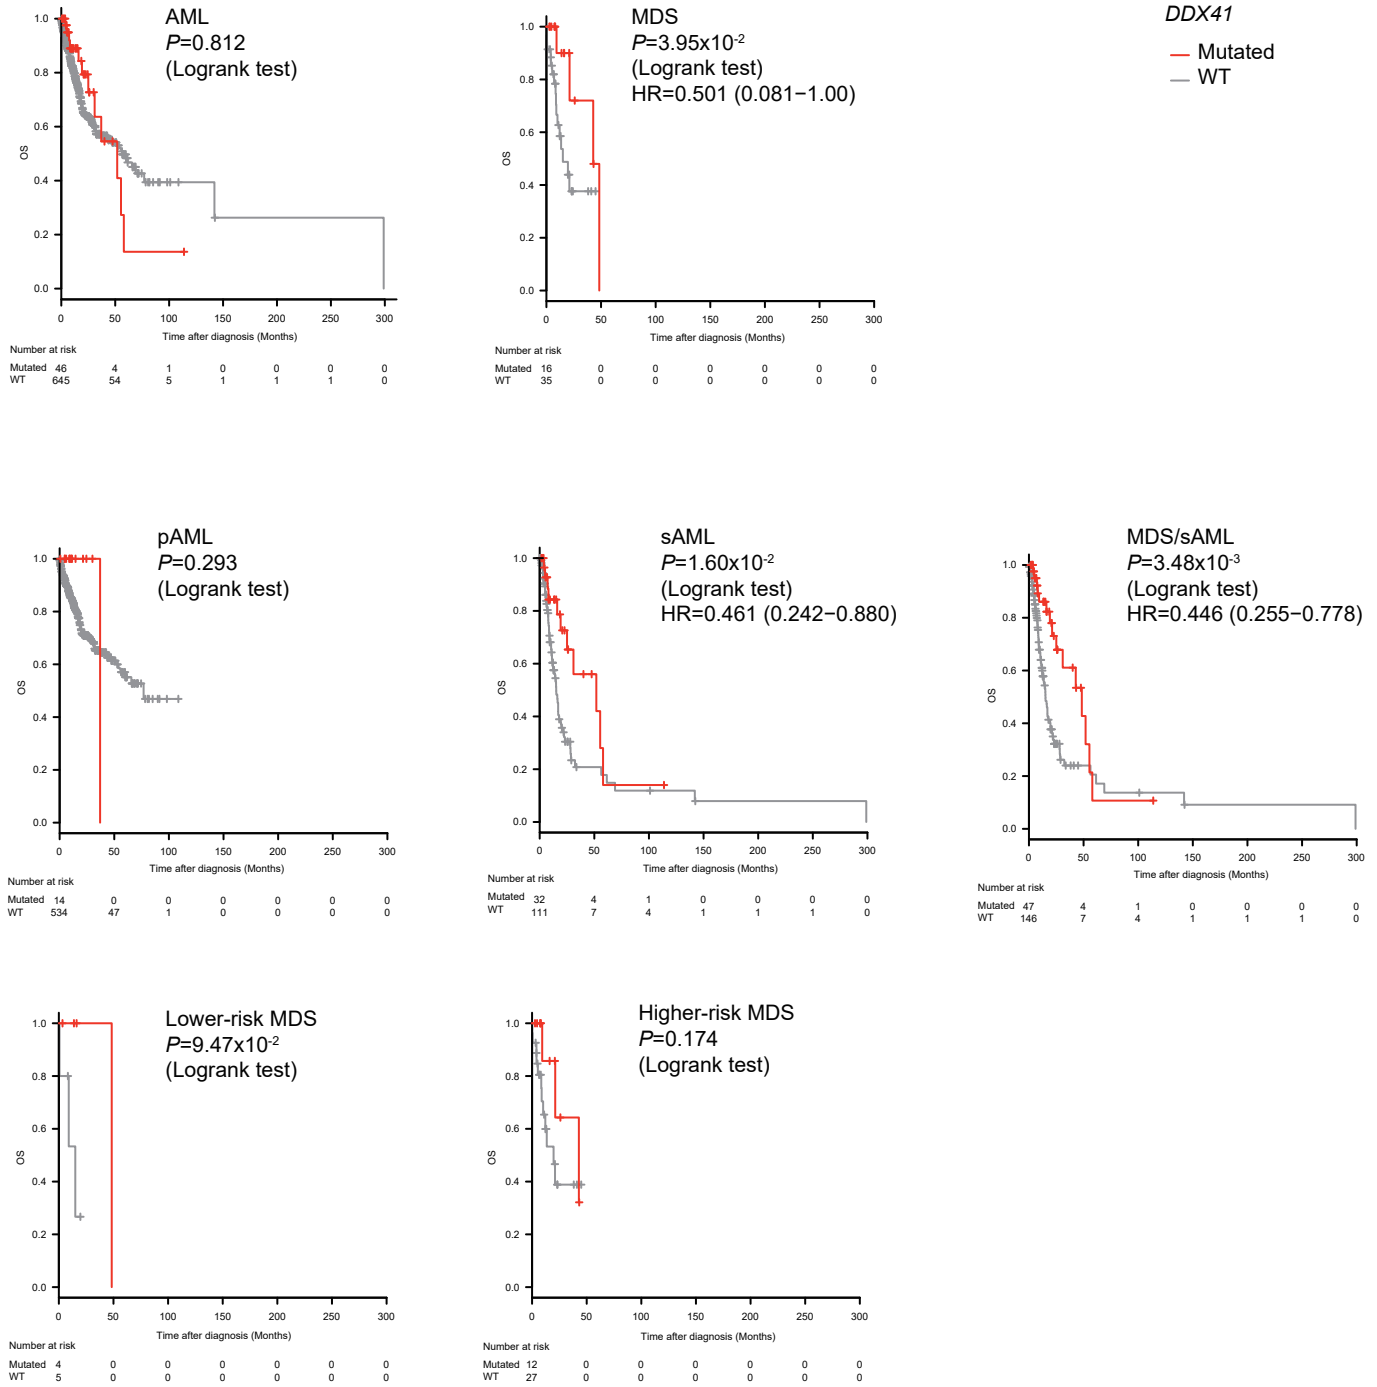

### Supplemental Figure 17. Prognostic impacts of *DDX41* mutations in the cohort with chemotherapy.

Kaplan-Meier curves of overall survivals (OS) for *DDX41*-mutated or -WT myeloid neoplasms (MNs) with chemotherapy were shown in each disease subtype. Statistical significance was tested by two-sided Log-rank test. Hazard ratios and 95% confidence intervals were calculated by Cox proportional hazard regression. The observations were censored at hematopoietic stem-cell transplantation.

# Supplemental Figure 18

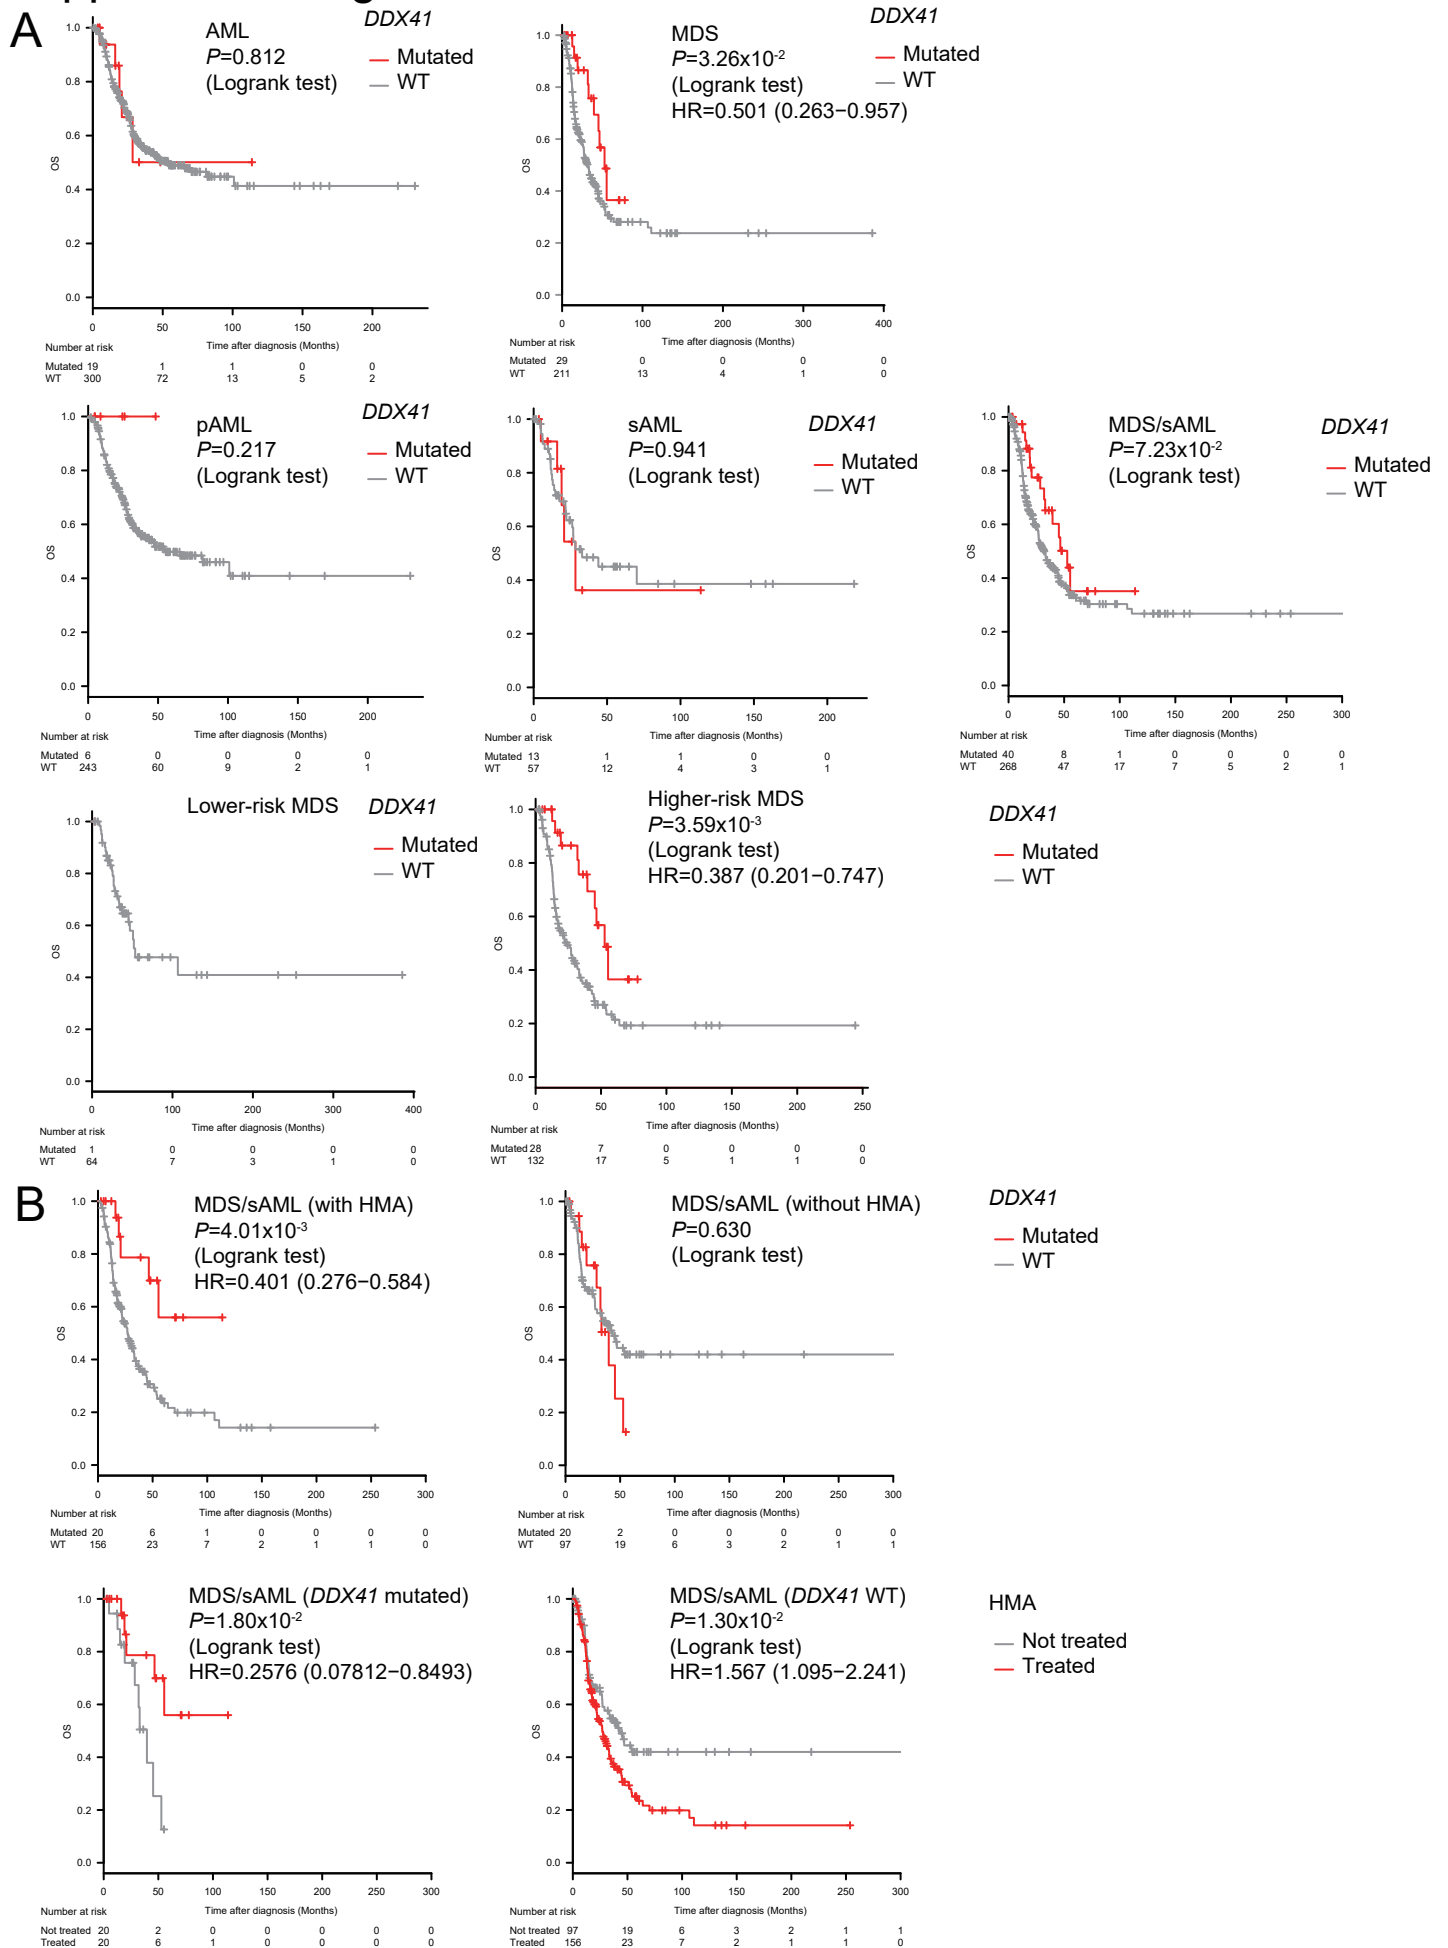

**Supplemental Figure 18. Prognostic impacts of *DDX41* mutations in the cohort with hematopoietic stem cell transplantation (HSCT).** **A, B** Kaplan-Meier curves of overall survivals (OS) for *DDX41*-mutated or -WT myeloid neoplasms (MNs) with HSCT were shown in each disease subtype (**A**) and with and without an additional hypomethylating agent (HMA) treatment (**B**). Statistical significance was tested by two-sided Log-rank test. Hazard ratios and 95% confidence intervals were calculated by Cox proportional hazard regression. The observations were not censored at HSCT.

# Supplemental Figure 19

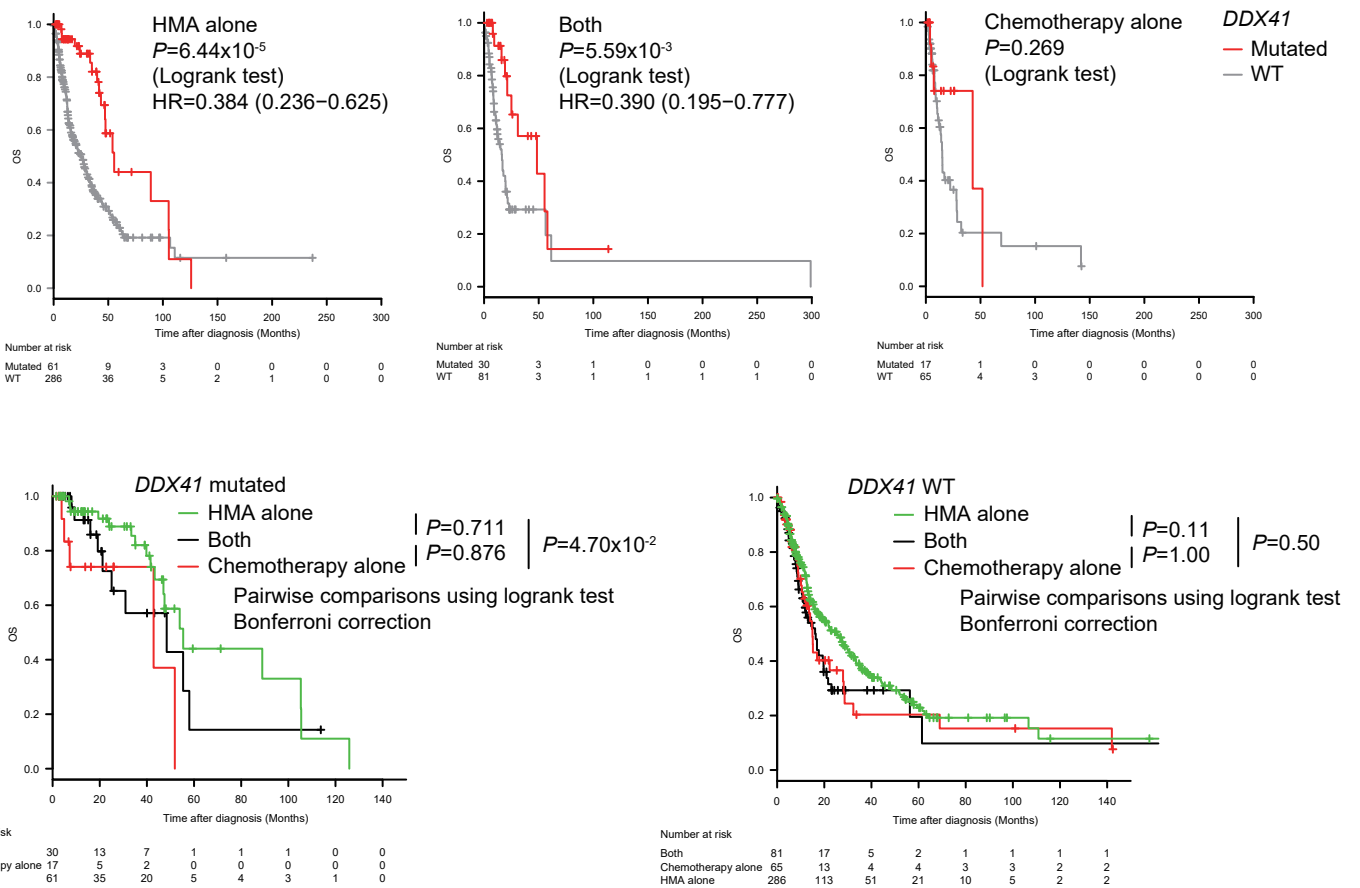

**Supplemental Figure 19. Prognostic impacts of *DDX41* mutations in the cohort with hypomethylating agent treatment and chemotherapy.** Kaplan-Meier curves of overall survivals (OS) for *DDX41*-mutated or -WT MDS/sAML were shown in the cohorts with hypomethylating agent (HMA) treatment alone, both HMA treatment and chemotherapy, and chemotherapy alone. Statistical significance was tested by two-sided Log-rank test. Hazard ratios and 95% confidence intervals were calculated by Cox proportional hazard regression. The observations were censored at HSCT.

# Supplemental Figure 20

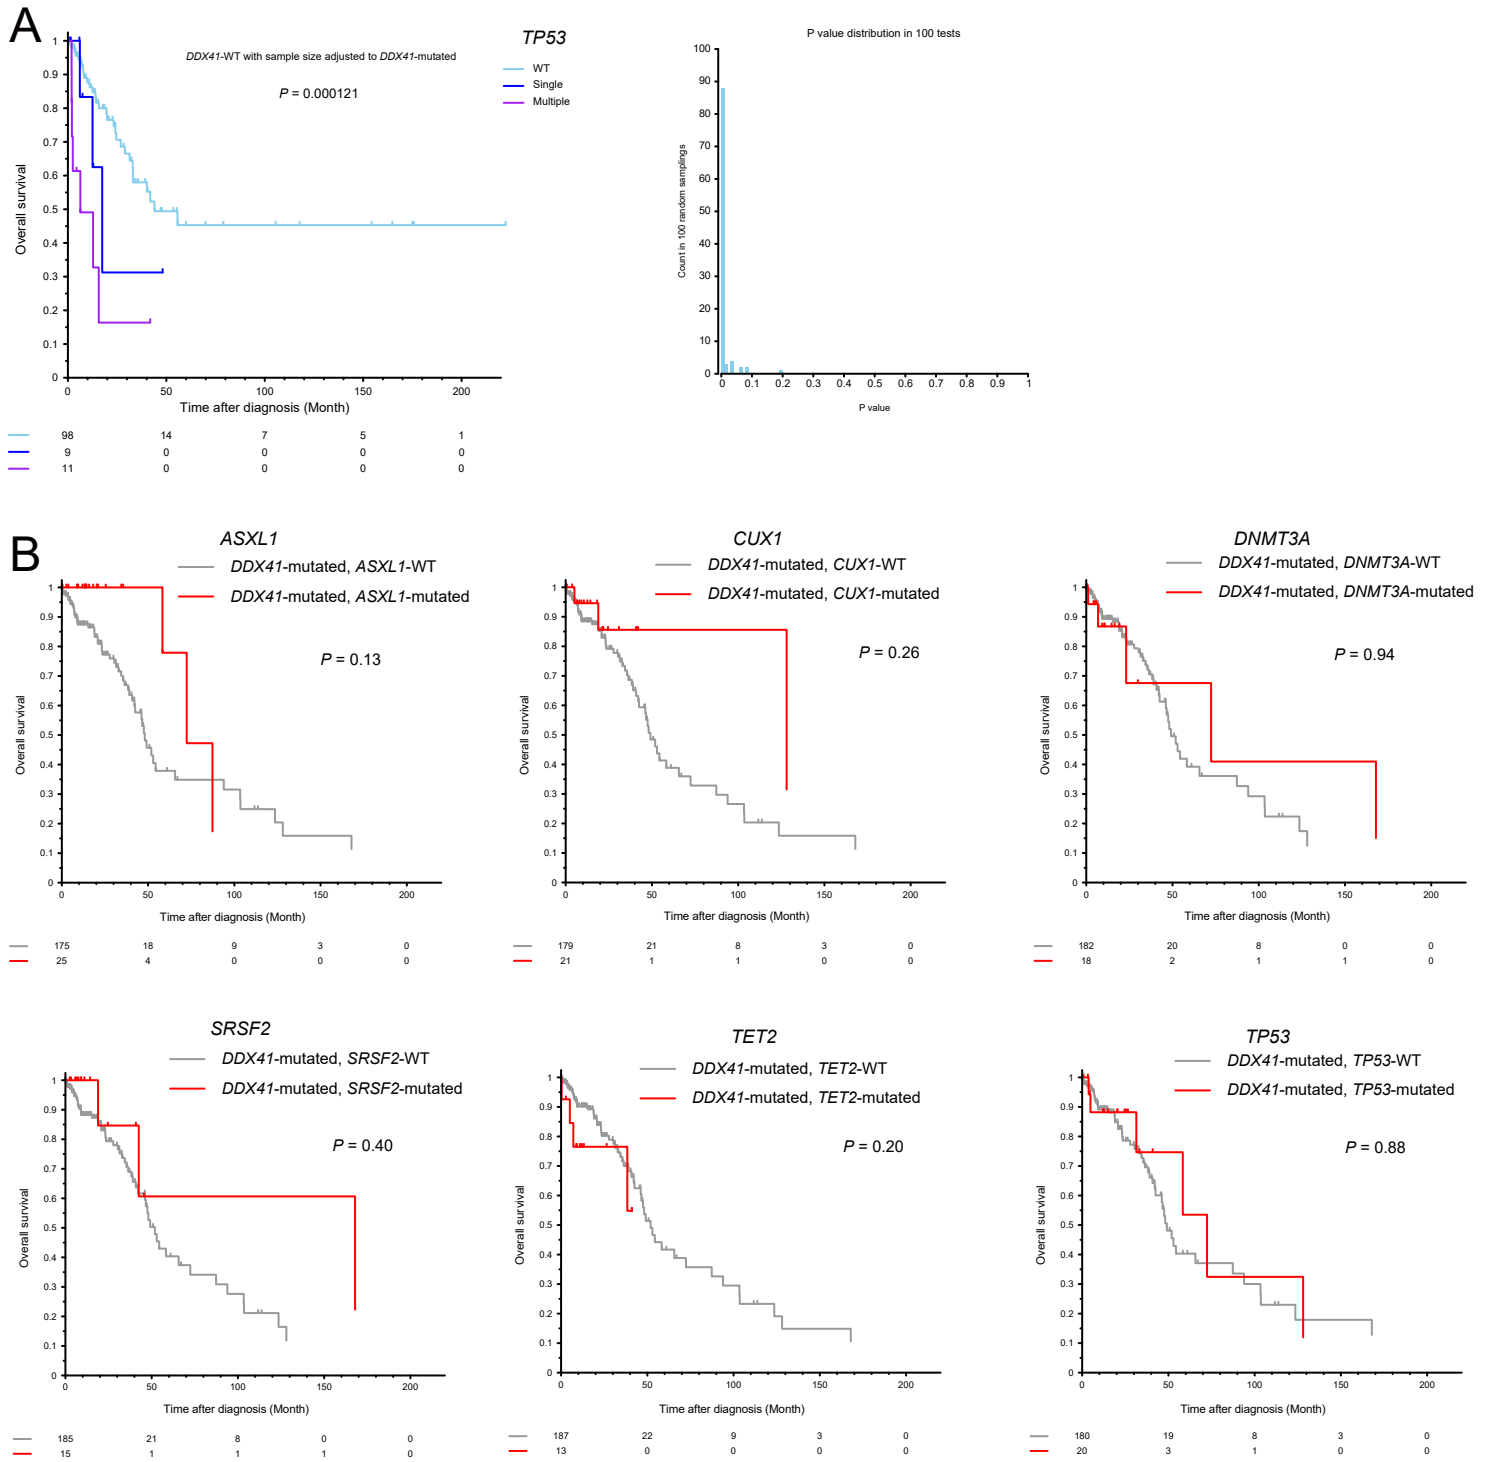

## Supplemental Figure 20. Prognostic impacts of co-mutations on DDX41-mutated MDS and AML.

**A** Kaplan-Meier curves of overall survival stratified by *TP53* mutation status are shown for selected *DDX41*-WT MNs with adjusted sample size to mutated ones (left), and the distribution of P-values calculated by logrank tests was drawn for such adjusted WT MNs randomly selected 100 times (right). **B** Kaplan-Meier curves of overall survivals for *DDX41*-mutated MDS and AML were shown in those with and without each co-mutation. Results of 6 most frequently co-mutated genes are shown. Co-mutated genes were indicated on the top of each panel. Statistical significance was tested by two-sided Log-rank test. The observations were censored at HSCT.

**Supplemental Table 1. Disease phenotypes in cases with and without survival data**

| <b>Variables</b>                               | <b>With survival data</b> | <b>Without survival data</b> | <b>Total</b> | <b>P-value*</b> |
|------------------------------------------------|---------------------------|------------------------------|--------------|-----------------|
| <b>Diagnostic or treatment-naïve cases (%)</b> | 2,360 (30.7%)             | 5,338 (69.3%)                | 7,698 (100%) |                 |
| <b>Diagnosis</b>                               |                           |                              |              | <0.0001         |
| Myelodysplastic syndromes                      | 908                       | 2,887                        | 3,795        |                 |
| Acute myeloid leukemia                         | 1,059                     | 1,321                        | 2,380        |                 |
| Myelodysplastic myeloproliferative neoplasms   | 94                        | 522                          | 616          |                 |
| Myeloproliferative neoplasms                   | 299                       | 608                          | 907          |                 |

\*Fisher's exact test

**Supplemental Table 2. Genes common to all the different RNA baits and amplicon libraries.**

---

|               |              |               |              |
|---------------|--------------|---------------|--------------|
| <i>ASXL1</i>  | <i>EZH2</i>  | <i>NF1</i>    | <i>SRSF2</i> |
| <i>BCOR</i>   | <i>FLT3</i>  | <i>NPM1</i>   | <i>STAG2</i> |
| <i>CALR</i>   | <i>GATA1</i> | <i>NRAS</i>   | <i>TET2</i>  |
| <i>CBL</i>    | <i>GATA2</i> | <i>PHF6</i>   | <i>TP53</i>  |
| <i>CEBPA</i>  | <i>IDH1</i>  | <i>PPM1D</i>  | <i>U2AF1</i> |
| <i>CSF3R</i>  | <i>IDH2</i>  | <i>PTPN11</i> | <i>WT1</i>   |
| <i>CUX1</i>   | <i>JAK2</i>  | <i>RAD21</i>  | <i>ZRSR2</i> |
| <i>DDX41</i>  | <i>KIT</i>   | <i>RUNX1</i>  |              |
| <i>DNMT3A</i> | <i>KRAS</i>  | <i>SETBP1</i> |              |
| <i>ETV6</i>   | <i>MPL</i>   | <i>SF3B1</i>  |              |

---



**Supplemental Table 3. Characteristics of MN patients with *DDX41* mutation (NM\_016222).**

| Age (years), Sex | Diagnosis       | Country       | Sporadic/Familial | P/LP germline <i>DDX41</i> variants | Somatic <i>DDX41</i> mutations | Cooccurring mutations                       |
|------------------|-----------------|---------------|-------------------|-------------------------------------|--------------------------------|---------------------------------------------|
| 80,M             | Higher-risk MDS | Germany       | Sporadic          | p.Q41*                              | p.R525H                        | <i>BCOR, CUX1, TET2</i>                     |
| 71,M             | pAML            | Japan         | Sporadic          | p.K102fs                            | p.I520F                        | <i>ASXL1, ATM, RUNX1, SETBP1</i>            |
| 94,M             | sAML            | Japan         | Sporadic          | p.R591Q                             | -                              | <i>CEBPA, IDH1, NRAS</i>                    |
| 73,M             | sAML            | Japan         | Sporadic          | p.A500fs                            | p.R525H                        | <i>PPM1D</i>                                |
| 84,M             | sAML            | Japan         | Sporadic          | -                                   | p.K494E                        | <i>PDS5B</i>                                |
| 61,F             | pAML            | United States | Sporadic          | p.R369*                             | p.R525H                        | <i>CBL, CUX1</i>                            |
| 70,M             | pAML            | United States | Sporadic          | p.D140fs                            | -                              | -                                           |
| 65,M             | sAML            | United States | Sporadic          | c.1302+3G>T                         | p.R525H                        | -                                           |
| 69,M             | sAML            | United States | Sporadic          | -                                   | p.R525H                        | -                                           |
| 76,M             | Lower-risk MDS  | United States | Sporadic          | p.D140fs                            | -                              | -                                           |
| 64,M             | sAML            | United States | Sporadic          | p.M1I                               | -                              | <i>CALR, SF3B1</i>                          |
| 63,F             | pAML            | United States | Sporadic          | p.D140fs                            | -                              | <i>DNMT3A</i>                               |
| 65,F             | pAML            | United States | Sporadic          | p.M1I                               | -                              | -                                           |
| 72,M             | Lower-risk MDS  | United States | Sporadic          | p.Q52fs                             | p.A225D                        | -                                           |
| 78,M             | Higher-risk MDS | United States | Sporadic          | p.E122*                             | p.R525H                        | <i>DNMT3A, NOTCH1, PHF6, TET2</i>           |
| 60,F             | Higher-risk MDS | United States | Sporadic          | p.R323C                             | -                              | -                                           |
| 65,M             | MDS/MPN         | United States | Sporadic          | p.D140fs                            | -                              | -                                           |
| 62,M             | Lower-risk MDS  | United States | Sporadic          | p.P206L                             | p.R525H                        | <i>CUX1, SRSF2</i>                          |
| 66,M             | sAML            | United States | Sporadic          | p.D140fs                            | -                              | -                                           |
| 82,M             | Lower-risk MDS  | United States | Sporadic          | -                                   | p.R525H, p.P179L               | -                                           |
| 47,M             | Lower-risk MDS  | United States | Sporadic          | p.L390R                             | p.P321L                        | <i>GNAS, JAK2</i>                           |
| 66,M             | Higher-risk MDS | United States | Familial          | p.F183I                             | p.R525H                        | -                                           |
| 80,M             | sAML            | United States | Sporadic          | p.M316fs                            | -                              | <i>SF3B1, TET2</i>                          |
| 61,M             | Higher-risk MDS | United States | Sporadic          | p.R339C                             | -                              | -                                           |
| 44,F             | pAML            | United States | Sporadic          | p.A500fs                            | -                              | -                                           |
| 65,M             | pAML            | United States | Sporadic          | p.Q410H                             | -                              | -                                           |
| 86,M             | sAML            | United States | Sporadic          | p.Q90*                              | -                              | -                                           |
| 61,M             | Higher-risk MDS | United States | Sporadic          | p.Y516C                             | -                              | -                                           |
| 69,M             | Lower-risk MDS  | United States | Sporadic          | p.I396T                             | p.D407delinsLD                 | -                                           |
| 62,F             | Higher-risk MDS | United States | Sporadic          | p.M1L                               | -                              | -                                           |
| 87,F             | Lower-risk MDS  | United States | Sporadic          | p.V445del                           | -                              | -                                           |
| NA,NA            | Higher-risk MDS | United States | Sporadic          | p.D140fs                            | p.R525H                        | <i>PRPF8, SF3B1, TET2</i>                   |
| 47,M             | pAML            | United States | Sporadic          | p.Q41*                              | -                              | <i>CEBPA, CUX1</i>                          |
| 78,F             | sAML            | United States | Sporadic          | c.434+1G>A                          | -                              | -                                           |
| 50,M             | Higher-risk MDS | United States | Sporadic          | p.D140fs                            | p.M378I                        | -                                           |
| 68,M             | Higher-risk MDS | Germany       | Sporadic          | -                                   | p.R525H                        | <i>CREBBP, SRSF2</i>                        |
| 71,F             | Lower-risk MDS  | Germany       | Sporadic          | p.P38fs                             | -                              | <i>RUNX1, SF3B1</i>                         |
| 79,M             | Lower-risk MDS  | Germany       | Sporadic          | p.Y516C                             | p.T227M                        | <i>PPM1D</i>                                |
| 68,M             | Higher-risk MDS | Germany       | Sporadic          | p.Y340N                             | p.R525H                        | <i>CUX1, SETBP1</i>                         |
| 72,M             | Lower-risk MDS  | Germany       | Sporadic          | -                                   | p.R525H, p.P179H               | <i>TET2</i>                                 |
| 62,F             | Higher-risk MDS | Germany       | Sporadic          | p.I240V                             | -                              | <i>TP53</i>                                 |
| 82,M             | Lower-risk MDS  | Germany       | Sporadic          | p.A270V                             | p.T227A                        | <i>SF3B1</i>                                |
| 68,F             | Lower-risk MDS  | Germany       | Sporadic          | p.E278D                             | -                              | <i>ASXL1</i>                                |
| 59,M             | sAML            | United States | Sporadic          | p.D140fs                            | -                              | -                                           |
| 55,M             | pAML            | United States | Sporadic          | p.K381*                             | -                              | -                                           |
| 74,M             | Higher-risk MDS | United States | Sporadic          | p.M1I                               | -                              | -                                           |
| 71,M             | Higher-risk MDS | United States | Sporadic          | -                                   | p.A225D                        | -                                           |
| 65,M             | Higher-risk MDS | United States | Sporadic          | p.D140fs                            | p.R525H                        | -                                           |
| 68,M             | Higher-risk MDS | United States | Sporadic          | -                                   | p.R525H                        | -                                           |
| 70,M             | Lower-risk MDS  | United States | Sporadic          | p.I396T                             | p.R525H                        | <i>GATA2, JAK2, NF1, PTPN11, SF3B1, WT1</i> |
| 87,M             | pAML            | United States | Sporadic          | p.T529fs                            | -                              | <i>RUNX1</i>                                |
| 78,M             | Lower-risk MDS  | United States | Sporadic          | -                                   | p.E256K                        | -                                           |
| 78,M             | Lower-risk MDS  | United States | Sporadic          | -                                   | p.P321L                        | -                                           |
| 75,M             | Lower-risk MDS  | United States | Sporadic          | p.LP237-238FT                       | -                              | <i>CUX1, GATA2</i>                          |
| 49,F             | MDS/MPN         | United States | Sporadic          | p.G578R                             | p.G524R                        | -                                           |
| 28,M             | pAML            | United States | Sporadic          | -                                   | p.T360I                        | -                                           |
| 63,M             | Lower-risk MDS  | United States | Sporadic          | -                                   | p.R525H                        | -                                           |
| 62,M             | MDS/MPN         | United States | Sporadic          | -                                   | p.K482R                        | -                                           |

|      |                 |               |          |             |                  |                            |
|------|-----------------|---------------|----------|-------------|------------------|----------------------------|
| 61,M | Lower-risk MDS  | United States | Sporadic | -           | p.C294fs         | -                          |
| 90,M | Higher-risk MDS | United States | Sporadic | p.D140fs    | -                | -                          |
| 90,M | Higher-risk MDS | United States | Sporadic | p.D140fs    | p.R525H          | -                          |
| 73,M | Higher-risk MDS | United States | Sporadic | p.D140fs    | p.R525H          | -                          |
| 62,M | sAML            | United States | Sporadic | p.M1I       | -                | -                          |
| 69,M | Higher-risk MDS | United States | Sporadic | -           | p.R525H, p.R323H | -                          |
| 73,F | sAML            | Japan         | Sporadic | p.A500fs    | p.R525H          | TP53                       |
| 65,M | pAML            | Japan         | Sporadic | -           | p.R525H          | ASXL1                      |
| 69,M | pAML            | Japan         | Sporadic | p.A500fs    | -                | TP53                       |
| 56,M | sAML            | Japan         | Sporadic | p.A500fs    | p.R525H          | PHF6                       |
| 82,M | sAML            | Japan         | Sporadic | p.A500fs    | p.R525H          | ASXL1, TP53                |
| 77,M | Lower-risk MDS  | Japan         | Sporadic | -           | p.R42G           | ETNK1                      |
| 73,M | Higher-risk MDS | Japan         | Sporadic | p.A500fs    | -                | GNAS                       |
| 78,M | Higher-risk MDS | Japan         | Sporadic | p.A500fs    | p.R525H          | DNMT3A                     |
| 79,M | Lower-risk MDS  | Japan         | Sporadic | p.E256K     | p.R525H          | RUNX1                      |
| 73,M | Higher-risk MDS | Japan         | Sporadic | p.E7*       | -                | JAK2, TET2                 |
| 72,M | sAML            | Japan         | Sporadic | p.S363del   | p.R525H          | DNMT3A, RUNX1, STAG2       |
| 15,M | Lower-risk MDS  | Japan         | Sporadic | p.H203L     | -                | -                          |
| 73,M | Lower-risk MDS  | Japan         | Sporadic | -           | p.R525H          | ASXL1, SH2B3               |
| 74,F | Lower-risk MDS  | Japan         | Sporadic | -           | p.A376V          | CUX1, GNAS, SRSF2, TP53    |
| 68,M | Higher-risk MDS | Japan         | Sporadic | p.S363del   | -                | -                          |
| 71,M | Higher-risk MDS | Japan         | Sporadic | p.S363del   | p.R525H          | TP53                       |
| 67,M | Higher-risk MDS | Japan         | Sporadic | p.C281Y     | p.G399V          | ASXL1, CUX1                |
| 75,F | Lower-risk MDS  | Japan         | Sporadic | p.S363del   | -                | IDH2, NF1, SF3B1           |
| 16,F | Higher-risk MDS | Japan         | Sporadic | -           | p.F183S          | GATA2                      |
| 64,F | pAML            | Japan         | Sporadic | p.A500fs    | p.R525H          | ASXL1, CUX1, SETBP1, SRSF2 |
| 77,M | Higher-risk MDS | Japan         | Sporadic | p.S363del   | p.R525H          | SRSF2                      |
| 68,F | Lower-risk MDS  | Japan         | Sporadic | p.I240V     | -                | -                          |
| 83,F | Lower-risk MDS  | Japan         | Sporadic | p.A500fs    | p.Q208E          | -                          |
| 66,M | Higher-risk MDS | Japan         | Sporadic | p.A500fs    | -                | -                          |
| 77,M | Lower-risk MDS  | Japan         | Sporadic | p.Y259C     | p.G530S          | TET2                       |
| 69,M | Higher-risk MDS | Japan         | Sporadic | p.S363del   | p.R525H          | ASXL1                      |
| 75,M | Higher-risk MDS | Japan         | Sporadic | p.A500fs    | p.R525H          | ASXL1                      |
| 80,M | Higher-risk MDS | Japan         | Sporadic | p.A500fs    | p.R525H          | TP53                       |
| 74,M | sAML            | Japan         | Sporadic | -           | p.G530D          | U2AF1                      |
| 78,M | sAML            | Japan         | Sporadic | p.S363del   | p.D344E          | -                          |
| 80,M | sAML            | Japan         | Sporadic | c.1303-1G>A | p.R525H          | ASXL1, SRSF2               |
| 79,M | Higher-risk MDS | Japan         | Sporadic | p.A500fs    | p.E345D          | ASXL1, SETBP1              |
| 70,M | Higher-risk MDS | Japan         | Sporadic | p.A500fs    | p.R525H          | CUX1, SRSF2                |
| 74,M | sAML            | Japan         | Sporadic | p.F183S     | p.R525H          | CUX1                       |
| 69,M | Higher-risk MDS | Japan         | Sporadic | p.A500fs    | p.R525H          | PPM1D, TP53                |
| NA,M | sAML            | Japan         | Sporadic | p.A500fs    | p.R525H          | ASXL1, CUX1, KRAS, SETBP1  |
| 65,M | pAML            | Japan         | Sporadic | p.E7*       | p.G530D          | -                          |
| 69,M | Higher-risk MDS | Japan         | Sporadic | p.A500fs    | p.L548H          | PHF6                       |
| 78,M | sAML            | Japan         | Sporadic | c.645-2A>G  | p.R525H          | CUX1, SF3B1, TET2          |
| 70,M | sAML            | Japan         | Sporadic | p.A500fs    | p.R525H          | ASXL1                      |
| 75,M | sAML            | Japan         | Sporadic | p.A500fs    | p.R525H          | CUX1, DNMT3A               |
| 50,F | Lower-risk MDS  | Japan         | Sporadic | -           | p.Q429H          | ETNK1, MPL, TP53           |
| 58,M | sAML            | Japan         | Sporadic | p.E256K     | p.T377N          | ASXL1, CUX1, PHF6          |
| 53,M | sAML            | Japan         | Sporadic | p.S363del   | p.L87F           | CALR, CEBPA, RUNX1         |
| 63,M | sAML            | Japan         | Sporadic | p.A500fs    | -                | -                          |
| 43,M | Higher-risk MDS | Japan         | Sporadic | p.Y259C     | p.T227M          | -                          |
| 63,M | sAML            | Japan         | Sporadic | p.K187R     | p.T227A          | SETBP1, SRSF2, STAG2       |
| 55,F | Lower-risk MDS  | Japan         | Sporadic | p.L553del   | -                | -                          |
| 60,M | Lower-risk MDS  | Japan         | Sporadic | p.A500fs    | -                | -                          |
| 53,F | sAML            | Japan         | Sporadic | p.A500fs    | -                | -                          |
| 61,M | sAML            | Japan         | Sporadic | -           | p.Q370*, p.T232A | ASXL1, EZH2, PHF6          |
| 65,M | sAML            | Japan         | Sporadic | p.A500fs    | -                | DNMT3A                     |
| 61,M | Lower-risk MDS  | Japan         | Sporadic | p.S363del   | -                | -                          |
| 53,M | Higher-risk MDS | Japan         | Sporadic | p.A500fs    | -                | -                          |
| 54,F | Higher-risk MDS | Japan         | Sporadic | p.A500fs    | -                | -                          |

|       |                 |            |          |                 |                              |                                                                           |
|-------|-----------------|------------|----------|-----------------|------------------------------|---------------------------------------------------------------------------|
| 63,F  | sAML            | Japan      | Sporadic | p.A500fs        | -                            | <i>DNMT3A, FLT3, TET2, WT1</i>                                            |
| 59,M  | Higher-risk MDS | Japan      | Sporadic | p.A500fs        | -                            | <i>KDM6A</i>                                                              |
| 65,M  | Higher-risk MDS | Japan      | Sporadic | c.298+1G>T      | p.T232A                      | <i>ASXL1, EZH2, JAK2, PRPF8</i>                                           |
| 50,M  | Higher-risk MDS | Japan      | Sporadic | p.L553del       | -                            | <i>BCOR</i>                                                               |
| 59,M  | Higher-risk MDS | Japan      | Sporadic | p.Y259C         | p.R525H                      | -                                                                         |
| 56,M  | Higher-risk MDS | Japan      | Sporadic | c.571+2T>G      | -                            | -                                                                         |
| 52,M  | sAML            | Japan      | Sporadic | p.A500fs        | -                            | <i>NF1</i>                                                                |
| 40,M  | Higher-risk MDS | Japan      | Sporadic | p.A500fs        | p.R525H                      | <i>SRSF2</i>                                                              |
| 59,M  | Higher-risk MDS | Japan      | Sporadic | p.Y259C         | p.R525H                      | <i>JAK2</i>                                                               |
| 62,M  | sAML            | Japan      | Sporadic | -               | p.P561H                      | <i>CEBPA, DNMT3A, FLT3, SRSF2</i>                                         |
| 50,F  | Higher-risk MDS | Japan      | Sporadic | -               | p.P499S                      | <i>EP300, FLT3, IRF1</i>                                                  |
| 62,M  | Lower-risk MDS  | Japan      | Sporadic | p.R219H         | -                            | <i>ASXL1, ASXL2, CDKN2A, GATA2, GNB1, SETD2, U2AF2</i>                    |
| 36,M  | Lower-risk MDS  | Japan      | Sporadic | p.A500fs        | -                            | -                                                                         |
| 38,M  | Lower-risk MDS  | Japan      | Sporadic | p.A500fs        | p.A225V                      | <i>MPL, U2AF1</i>                                                         |
| 60,F  | Lower-risk MDS  | Japan      | Sporadic | p.S363del       | -                            | -                                                                         |
| 59,F  | Higher-risk MDS | Japan      | Sporadic | p.A500fs        | -                            | -                                                                         |
| 61,M  | sAML            | Japan      | Sporadic | p.A500fs        | -                            | <i>ASXL1</i>                                                              |
| 53,M  | MDS/MPN         | Japan      | Sporadic | p.Y259C         | -                            | -                                                                         |
| 42,M  | Higher-risk MDS | Japan      | Sporadic | p.R124fs        | -                            | -                                                                         |
| 62,M  | Lower-risk MDS  | Japan      | Sporadic | p.A500fs        | -                            | <i>TP53</i>                                                               |
| 65,M  | sAML            | Japan      | Sporadic | p.Y259C         | -                            | <i>TP53</i>                                                               |
| 60,M  | Higher-risk MDS | Japan      | Sporadic | -               | p.R525H                      | <i>ASXL1</i>                                                              |
| 70,F  | Higher-risk MDS | Japan      | Sporadic | p.A500fs        | p.R525H                      | -                                                                         |
| 59,M  | sAML            | Japan      | Familial | p.S363del       | p.R525H                      | -                                                                         |
| 65,M  | sAML            | Japan      | Sporadic | p.A500fs        | p.R525H                      | <i>ASXL1, EZH2, RUNX1</i>                                                 |
| 38,M  | pAML            | Japan      | Sporadic | -               | p.G356D                      | <i>DNMT3A</i>                                                             |
| 57,M  | Higher-risk MDS | Japan      | Sporadic | p.E7*           | p.R525H                      | <i>ASXL1, TP53</i>                                                        |
| 28,M  | Lower-risk MDS  | Japan      | Sporadic | -               | p.F183S                      | -                                                                         |
| 57,M  | Higher-risk MDS | Italy      | Sporadic | p.I207T         | -                            | -                                                                         |
| 51,M  | sAML            | Italy      | Sporadic | p.G218D         | -                            | -                                                                         |
| 74,M  | MDS/MPN         | Italy      | Sporadic | p.V445del       | -                            | <i>IDH2, JAK2, SRSF2</i>                                                  |
| 62,M  | Higher-risk MDS | Italy      | Sporadic | p.G19*          | p.A488T                      | <i>DNMT3A</i>                                                             |
| 58,M  | Higher-risk MDS | Italy      | Sporadic | p.Q48*          | -                            | -                                                                         |
| 81,M  | Lower-risk MDS  | Italy      | Sporadic | p.M1I           | p.P321L                      | -                                                                         |
| NA,M  | Lower-risk MDS  | Italy      | Sporadic | p.H160P         | p.P321L                      | <i>SRSF2</i>                                                              |
| 59,F  | Lower-risk MDS  | Italy      | Sporadic | p.R267W         | -                            | <i>DNMT3A, IDH1, SRSF2</i>                                                |
| 48,M  | sAML            | Italy      | Sporadic | p.G218D         | -                            | -                                                                         |
| 67,M  | Higher-risk MDS | Italy      | Sporadic | p.M1I           | p.T232A                      | <i>CBL, TP53</i>                                                          |
| 68,M  | Lower-risk MDS  | Italy      | Sporadic | p.G218D         | p.P265L                      | <i>SH2B3</i>                                                              |
| NA,M  | Higher-risk MDS | Italy      | Sporadic | -               | p.G530D                      | <i>CSF3R</i>                                                              |
| NA,M  | sAML            | Italy      | Sporadic | -               | p.A447T, p.R525H, c.645-1G>A | <i>TET2</i>                                                               |
| 72,M  | Higher-risk MDS | Japan      | Sporadic | p.E256K         | -                            | <i>PPM1D</i>                                                              |
| NA,NA | sAML            | Netherland | Sporadic | c.435-1G2A>1A2C | p.R525H                      | -                                                                         |
| NA,NA | sAML            | Netherland | Sporadic | p.M1I           | p.R525H                      | -                                                                         |
| 72,M  | Higher-risk MDS | Thailand   | Sporadic | p.S21fs         | -                            | <i>DNMT3A, KIT, NPM1</i>                                                  |
| 64,M  | sAML            | Thailand   | Sporadic | p.S21fs         | p.R525H                      | <i>PHF6</i>                                                               |
| 64,M  | Higher-risk MDS | Thailand   | Sporadic | p.V234fs        | -                            | <i>DNMT3A</i>                                                             |
| 68,F  | Higher-risk MDS | Thailand   | Sporadic | -               | p.R525H                      | -                                                                         |
| 65,M  | Higher-risk MDS | Thailand   | Sporadic | p.R339H         | p.K494T                      | <i>TET2, ZRSR2</i>                                                        |
| 77,M  | Higher-risk MDS | Thailand   | Sporadic | -               | p.F438L                      | -                                                                         |
| 69,M  | Higher-risk MDS | Japan      | Sporadic | p.A500fs        | p.R525H                      | -                                                                         |
| 53,M  | Higher-risk MDS | Japan      | Sporadic | p.A500fs        | -                            | -                                                                         |
| 83,M  | Higher-risk MDS | Japan      | Sporadic | p.V435fs        | p.R525H                      | <i>DNMT3A, KMT2A_PTD</i>                                                  |
| 69,M  | sAML            | Japan      | Sporadic | p.A500fs        | p.D490Y                      | <i>SRSF2</i>                                                              |
| 85,M  | Higher-risk MDS | Japan      | Sporadic | -               | p.G530D, p.S493Y             | -                                                                         |
| 92,M  | Higher-risk MDS | Japan      | Sporadic | p.A500fs        | p.E345D                      | <i>ASXL1, TP53</i>                                                        |
| 82,M  | Lower-risk MDS  | Japan      | Sporadic | -               | p.R471Q, p.E131K             | -                                                                         |
| 73,M  | Higher-risk MDS | Japan      | Sporadic | p.A500fs        | p.R525H                      | <i>ASXL2, CEBPA, GATA2, GNAS, JARID2, NF1, PDS5B, SH2B3, SRSF2, USP9X</i> |
| 76,F  | Higher-risk MDS | Japan      | Sporadic | p.A500fs        | p.R525H                      | <i>CUX1, SRSF2, TP53</i>                                                  |

|       |                 |                |          |            |                          |                                                 |
|-------|-----------------|----------------|----------|------------|--------------------------|-------------------------------------------------|
| 76,F  | Higher-risk MDS | Japan          | Sporadic | p.F183S    | p.P321L                  | <i>NFE2</i>                                     |
| 70,M  | sAML            | Japan          | Sporadic | p.A500fs   | p.G530D                  | <i>CUX1</i>                                     |
| 69,M  | Higher-risk MDS | Japan          | Sporadic | p.E256K    | p.T227M                  | <i>PPM1D</i>                                    |
| 71,M  | Higher-risk MDS | Japan          | Sporadic | p.S363del  | -                        | -                                               |
| 79,M  | Higher-risk MDS | Japan          | Sporadic | p.E7*      | -                        | <i>ZRSR2</i>                                    |
| 72,F  | Higher-risk MDS | Japan          | Sporadic | p.Y259C    | p.R525H                  | -                                               |
| 66,M  | sAML            | Japan          | Sporadic | p.A500fs   | p.R525H                  | <i>TP53</i>                                     |
| 66,M  | Higher-risk MDS | Japan          | Sporadic | p.E7*      | p.P321L                  | <i>JAK2, SUZ12</i>                              |
| 68,M  | Higher-risk MDS | Japan          | Sporadic | -          | p.R525H, p.R323H         | <i>EZH2</i>                                     |
| 74,F  | sAML            | Japan          | Sporadic | -          | p.L373P, p.R525H         | -                                               |
| 72,M  | Higher-risk MDS | Japan          | Sporadic | p.E7*      | p.L390H, p.R525H         | <i>ASXL1, BCORL1, SF3B1, TET2</i>               |
| 67,M  | Higher-risk MDS | Japan          | Sporadic | p.A500fs   | p.R525H                  | <i>GNAS</i>                                     |
| 74,M  | Higher-risk MDS | Japan          | Sporadic | p.A500fs   | -                        | <i>ASXL1, PPM1D, TP53</i>                       |
| 64,M  | Higher-risk MDS | Japan          | Sporadic | p.S363del  | p.R525H                  | <i>ASXL1</i>                                    |
| 76,F  | sAML            | Japan          | Sporadic | p.A500fs   | -                        | <i>ASXL1, PPM1D</i>                             |
| 77,M  | Higher-risk MDS | Japan          | Sporadic | p.A500fs   | p.R525H                  | <i>DNMT3A</i>                                   |
| 77,M  | Higher-risk MDS | Japan          | Sporadic | p.A500fs   | p.R525H                  | <i>ASXL2, PHF6</i>                              |
| 71,M  | Higher-risk MDS | Japan          | Sporadic | p.A500fs   | p.G530D                  | <i>DNMT3A</i>                                   |
| 57,F  | sAML            | Japan          | Sporadic | p.Y279*    | p.R525H                  | <i>ASXL1, CUX1</i>                              |
| 71,NA | Lower-risk MDS  | Japan          | Sporadic | p.A500fs   | p.H518N                  | -                                               |
| 63,M  | sAML            | Japan          | Sporadic | p.Y259C    | p.H91Y, p.R525H          | <i>DNMT3A</i>                                   |
| 69,M  | Higher-risk MDS | Japan          | Sporadic | -          | p.R525H, p.L237*         | <i>ASXL1, CREBBP, RUNX1</i>                     |
| 74,M  | pAML            | Japan          | Sporadic | p.A500fs   | p.R525H                  | <i>U2AF1</i>                                    |
| 61,M  | Higher-risk MDS | Japan          | Sporadic | p.Y259C    | p.R525H                  | <i>CUX1</i>                                     |
| 72,M  | sAML            | Japan          | Sporadic | p.T529fs   | p.R525H                  | <i>CUX1, EZH2, SETBP1, TET2</i>                 |
| 89,M  | sAML            | Japan          | Sporadic | -          | p.R525H                  | <i>JAK2, U2AF1</i>                              |
| 84,M  | sAML            | Japan          | Sporadic | p.A500fs   | p.R525H                  | -                                               |
| 44,F  | sAML            | Japan          | Sporadic | p.A500fs   | p.R525H                  | <i>CUX1, SRSF2, STAG2</i>                       |
| 72,M  | sAML            | Japan          | Sporadic | -          | p.R525H                  | <i>SRSF2</i>                                    |
| 64,M  | Higher-risk MDS | Japan          | Sporadic | p.S363del  | p.G530D                  | <i>DNMT3A, TET2</i>                             |
| 46,M  | Higher-risk MDS | Japan          | Sporadic | p.A500fs   | p.R525H                  | -                                               |
| 69,M  | MDS/MPN         | Japan          | Sporadic | p.A500fs   | -                        | <i>ASXL1, EZH2, RUNX1, TET2</i>                 |
| 65,M  | pAML            | Japan          | Sporadic | p.A500fs   | p.R525H                  | <i>ASXL1, CBL, SETBP1, TET2</i>                 |
| 66,M  | Lower-risk MDS  | Japan          | Sporadic | p.A500fs   | -                        | <i>TP53, U2AF1</i>                              |
| 68,F  | Higher-risk MDS | Japan          | Sporadic | p.Y259C    | p.R525H                  | <i>DNMT3A, PHF6, TERT</i>                       |
| 81,M  | Higher-risk MDS | Japan          | Sporadic | p.A500fs   | p.R525H                  | -                                               |
| 80,M  | Lower-risk MDS  | Japan          | Sporadic | -          | p.Y451C, p.L87V, p.G586R | <i>ASXL1, DNMT3A, TP53, U2AF1, WT1</i>          |
| 75,F  | Higher-risk MDS | Japan          | Sporadic | p.G577*    | p.V333I, p.T236M         | <i>CUX1, ETV6, GNAS, PIGA, TP53, U2AF1</i>      |
| 76,M  | Lower-risk MDS  | Japan          | Sporadic | -          | p.R22S                   | <i>ASXL1, BCORL1, ETNK1, RUNX1, TP53, U2AF1</i> |
| 66,M  | pAML            | Japan          | Sporadic | p.Q208R    | p.R525H                  | -                                               |
| 86,M  | Higher-risk MDS | Japan          | Sporadic | p.A500fs   | p.R525H                  | <i>TET2, TP53</i>                               |
| 65,M  | Lower-risk MDS  | Japan          | Sporadic | p.Y259C    | p.R525H                  | <i>EZH2, TP53</i>                               |
| 76,M  | sAML            | Japan          | Sporadic | p.A500fs   | p.L390F                  | <i>DNMT3A, KMT2A_PTD, RUNX1, SRSF2</i>          |
| 78,M  | pAML            | Japan          | Sporadic | c.645-2A>G | p.R525H                  | <i>DNMT3A, U2AF1</i>                            |
| 35,M  | Higher-risk MDS | Japan          | Sporadic | p.P432S    | -                        | -                                               |
| 45,M  | Higher-risk MDS | Japan          | Sporadic | p.Y259C    | p.R525H                  | <i>KMT2A PTD</i>                                |
| 70,M  | sAML            | Japan          | Sporadic | p.A500fs   | p.R525H                  | -                                               |
| 59,F  | sAML            | United Kingdom | Sporadic | p.M316fs   | p.E345D                  | <i>CUX1, TP53</i>                               |
| 72,M  | Higher-risk MDS | United Kingdom | Sporadic | p.D140fs   | p.R525H                  | <i>DNMT3A</i>                                   |
| 75,M  | sAML            | United Kingdom | Sporadic | p.D140fs   | -                        | -                                               |
| 74,M  | sAML            | United Kingdom | Sporadic | p.M1I      | p.A403-D407delinsH       | <i>CHEK2</i>                                    |
| 68,M  | Higher-risk MDS | United Kingdom | Sporadic | p.D140fs   | p.R525H                  | -                                               |
| 71,M  | sAML            | United Kingdom | Sporadic | p.D140fs   | -                        | <i>PHF6, RAD21</i>                              |
| 64,M  | Higher-risk MDS | United Kingdom | Sporadic | p.Q329*    | p.G530S                  | -                                               |
| 72,M  | Higher-risk MDS | United Kingdom | Sporadic | p.D140fs   | p.P321L                  | <i>ASXL1, EZH2, ZRSR2</i>                       |
| 68,M  | sAML            | United Kingdom | Sporadic | p.R323C    | p.R525H                  | <i>CUX1, PHF6, SRSF2</i>                        |
| 63,F  | sAML            | United Kingdom | Sporadic | p.M316fs   | -                        | -                                               |
| 69,F  | Lower-risk MDS  | United Kingdom | Sporadic | -          | p.G524R                  | <i>SRSF2, TET2</i>                              |
| 80,M  | Higher-risk MDS | United Kingdom | Sporadic | p.D140fs   | p.G589R                  | <i>DNMT3A</i>                                   |

|      |                 |                |          |                 |         |                                 |
|------|-----------------|----------------|----------|-----------------|---------|---------------------------------|
| 84,M | Lower-risk MDS  | United Kingdom | Sporadic | p.R369G         | p.E2*   | -                               |
| 70,F | sAML            | United Kingdom | Sporadic | -               | p.R525H | <i>EZH2, TET2</i>               |
| 73,M | sAML            | United Kingdom | Sporadic | p.M1I           | -       | <i>BCOR</i>                     |
| 72,M | Lower-risk MDS  | United Kingdom | Sporadic | p.G173R         | p.G530D | -                               |
| 80,M | Lower-risk MDS  | United Kingdom | Sporadic | p.A492fs        | -       | -                               |
| 76,M | Higher-risk MDS | United Kingdom | Sporadic | p.D140fs        | p.R525H | <i>ASXL1, PHF6, RUNX1</i>       |
| 63,M | Lower-risk MDS  | United Kingdom | Sporadic | p.P321L         | -       | -                               |
| 90,F | MDS/MPN         | United Kingdom | Sporadic | p.D140fs        | -       | <i>CUX1, SRSF2, TET2</i>        |
| 78,F | sAML            | United Kingdom | Sporadic | p.D140fs        | p.V408F | <i>SETBP1, SRSF2</i>            |
| 76,F | pAML            | United Kingdom | Sporadic | p.G173R         | p.P321L | <i>DNMT3A, KRAS, NPM1</i>       |
| 55,M | pAML            | United Kingdom | Sporadic | p.D140fs        | -       | -                               |
| 71,F | Higher-risk MDS | United Kingdom | Sporadic | p.L428P         | p.C264R | -                               |
| 68,F | Higher-risk MDS | United Kingdom | Sporadic | p.M1I           | p.G530S | <i>ASXL1, CBL, EZH2, SETBP1</i> |
| 76,M | Higher-risk MDS | United Kingdom | Sporadic | p.K102fs        | p.R471Q | <i>CUX1</i>                     |
| 83,F | sAML            | United Kingdom | Sporadic | p.M1I           | p.R525H | -                               |
| 75,F | MPN             | United Kingdom | Sporadic | p.V412I         | -       | <i>IDH2, PPM1D</i>              |
| 44,M | Lower-risk MDS  | United Kingdom | Sporadic | c.138+1G>C      | p.P321L | -                               |
| 74,M | Lower-risk MDS  | United Kingdom | Sporadic | c.435-1G2A>1A2C | p.P321L | <i>ETV6</i>                     |
| 81,F | sAML            | United Kingdom | Sporadic | p.Q210K         | p.R525H | -                               |
| 63,F | sAML            | United Kingdom | Sporadic | p.L373P         | p.R525H | <i>SRSF2</i>                    |
| 81,F | sAML            | United Kingdom | Sporadic | p.I240del       | p.R525H | <i>TET2</i>                     |
| 60,M | sAML            | United Kingdom | Sporadic | p.K102fs        | p.R525H | -                               |
| 79,M | sAML            | United Kingdom | Sporadic | p.M316fs        | p.R525H | <i>ASXL1, RUNX1</i>             |
| 52,M | pAML            | United Kingdom | Sporadic | c.435-1G2A>1A2C | p.G530S | <i>CUX1</i>                     |
| 73,M | sAML            | Japan          | Sporadic | p.T529fs        | p.R525H | <i>TP53</i>                     |
| 69,M | sAML            | Japan          | Sporadic | p.Y259C         | p.K494E | <i>TP53</i>                     |
| 78,M | Higher-risk MDS | Japan          | Sporadic | p.A500fs        | p.R525H | <i>WT1</i>                      |
| 52,F | Higher-risk MDS | Japan          | Sporadic | -               | p.A376V | <i>CEBPA, TP53</i>              |
| 63,M | sAML            | Japan          | Sporadic | p.A500fs        | p.R525H | <i>TP53</i>                     |
| 53,F | sAML            | Japan          | Sporadic | -               | p.R525H | <i>SETBP1</i>                   |
| 79,M | Lower-risk MDS  | Japan          | Sporadic | p.R323C         | p.P379L | -                               |
| 73,M | Higher-risk MDS | Japan          | Sporadic | p.A500fs        | p.V517E | -                               |
| 76,M | Higher-risk MDS | Japan          | Sporadic | p.E7*           | -       | -                               |
| 71,M | sAML            | Japan          | Sporadic | p.A500fs        | p.R525H | <i>SMC3</i>                     |
| 77,M | Lower-risk MDS  | Japan          | Sporadic | p.S363del       | p.G530S | -                               |
| 66,M | Higher-risk MDS | Japan          | Sporadic | p.A500fs        | p.R525H | -                               |
| 75,M | Higher-risk MDS | Japan          | Sporadic | p.A500fs        | p.R525H | <i>DNMT3A, TP53</i>             |
| 20,M | pAML            | Japan          | Sporadic | p.A500fs        | -       | -                               |
| 54,F | sAML            | Japan          | Sporadic | p.A500fs        | p.R525H | -                               |
| 73,M | sAML            | Japan          | Sporadic | p.A500fs        | p.R525H | <i>ASXL1, CBL, DNMT3A</i>       |
| 60,M | Higher-risk MDS | Japan          | Sporadic | p.A500fs        | -       | <i>ASXL1, SETBP1, U2AF1</i>     |
| 70,M | Higher-risk MDS | Japan          | Sporadic | c.571+2T>G      | p.R525H | <i>DNMT3A</i>                   |
| 48,F | pAML            | Japan          | Familial | p.A500fs        | -       | -                               |
| 76,M | Higher-risk MDS | Japan          | Sporadic | p.A500fs        | p.R525H | -                               |
| 67,M | sAML            | Japan          | Sporadic | p.L548P         | p.P379Q | <i>CUX1</i>                     |
| 70,M | Higher-risk MDS | Japan          | Sporadic | p.A500fs        | p.R525H | <i>ASXL1, SETBP1</i>            |
| 51,M | Higher-risk MDS | Japan          | Sporadic | p.E440del       | -       | -                               |
| 66,F | Higher-risk MDS | Japan          | Sporadic | p.R323H         | p.R525H | -                               |
| 49,M | Lower-risk MDS  | Japan          | Sporadic | p.A500fs        | p.A346T | <i>ASXL1, EZH2</i>              |
| 84,M | Higher-risk MDS | Japan          | Sporadic | p.A500fs        | p.R525H | <i>CUX1</i>                     |
| 83,M | Lower-risk MDS  | Japan          | Sporadic | p.V504I         | -       | <i>SF3B1</i>                    |
| 65,M | AML             | Japan          | Sporadic | p.A500fs        | -       | -                               |
| 70,M | pAML            | Germany        | Familial | p.D140fs        | p.R525H | -                               |
| 44,F | sAML            | Germany        | Familial | p.D140fs        | -       | -                               |
| 45,M | pAML            | Germany        | Familial | p.D140fs        | p.R525H | -                               |
| 64,M | Lower-risk MDS  | United States  | Familial | p.I396T         | p.R525H | -                               |
| 66,M | Lower-risk MDS  | United States  | Familial | p.I396T         | p.R525H | -                               |
| 67,M | Higher-risk MDS | United States  | Familial | p.D140fs        | p.R525H | <i>TP53</i>                     |
| 73,M | sAML            | United States  | Familial | p.D140fs        | -       | -                               |
| 56,M | pAML            | United States  | Familial | p.D140fs        | -       | -                               |
| 72,M | Higher-risk MDS | United States  | Sporadic | p.D140fs        | p.R525H | <i>RUNX1</i>                    |

|      |                 |               |          |                 |             |                           |
|------|-----------------|---------------|----------|-----------------|-------------|---------------------------|
| 62,M | Higher-risk MDS | United States | Sporadic | p.D140fs        | -           | -                         |
| 85,M | sAML            | United States | Sporadic | p.D140fs        | p.R525H     | -                         |
| 58,M | Higher-risk MDS | United States | Sporadic | p.D140fs        | -           | -                         |
| 69,M | MDS/MPN         | United States | Sporadic | p.D140fs        | -           | <i>KRAS, SETBP1</i>       |
| 88,M | Higher-risk MDS | United States | Sporadic | p.D140fs        | -           | -                         |
| 71,M | pAML            | United States | Sporadic | p.D140fs        | -           | -                         |
| 68,M | sAML            | United States | Sporadic | p.D140fs        | -           | <i>NRAS</i>               |
| 64,M | Lower-risk MDS  | United States | Sporadic | -               | p.R525H     | -                         |
| 68,M | Higher-risk MDS | United States | Sporadic | -               | p.R525H     | -                         |
| 63,M | pAML            | United States | Sporadic | -               | p.R525H     | -                         |
| 66,M | Lower-risk MDS  | United States | Sporadic | -               | p.R525H     | <i>RUNX1, TP53</i>        |
| 46,M | Higher-risk MDS | United States | Sporadic | -               | p.R525H     | -                         |
| 70,F | Lower-risk MDS  | United States | Sporadic | -               | p.E247K     | -                         |
| 68,M | pAML            | United States | Sporadic | -               | c.1230+1C>T | -                         |
| 53,F | AML             | United States | Familial | p.P78fs         | p.R525H     | <i>JAK2</i>               |
| 80,M | sAML            | United States | Familial | p.P78fs         | -           | -                         |
| NA,M | AML             | United States | Familial | p.Q90*          | -           | -                         |
| 60,M | AML             | United States | Familial | p.K108fs        | -           | -                         |
| 72,F | sAML            | United States | Familial | p.D140fs        | -           | -                         |
| 67,M | Higher-risk MDS | United States | Familial | c.435-1G2A>1A2C | -           | -                         |
| 65,M | sAML            | United States | Familial | p.G218D         | -           | -                         |
| 36,F | Higher-risk MDS | United States | Familial | p.G218D         | -           | <i>TET2</i>               |
| 67,M | Higher-risk MDS | United States | Familial | p.E265K         | -           | -                         |
| 54,F | MDS             | United States | Familial | p.L283fs        | -           | -                         |
| 62,M | Lower-risk MDS  | United States | Familial | p.C338Y         | -           | <i>TP53</i>               |
| 65,F | AML             | United States | Familial | p.L373P         | -           | -                         |
| 80,M | sAML            | United States | Familial | p.K381*         | -           | -                         |
| 75,M | MDS             | United States | Familial | p.Q429*         | -           | -                         |
| 71,M | AML             | United States | Familial | p.A492fs        | -           | -                         |
| 64,F | Higher-risk MDS | United States | Familial | p.A500fs        | -           | -                         |
| 72,M | Higher-risk MDS | United States | Familial | p.Q410fs        | -           | <i>EGFR</i>               |
| 67,F | AML             | United States | Familial | p.M11           | -           | -                         |
| 72,M | MDS             | United States | Familial | p.M11           | -           | -                         |
| 73,M | AML             | United States | Familial | p.M11           | -           | -                         |
| 65,M | AML             | United States | Familial | p.M11           | -           | -                         |
| 52,M | AML             | United States | Familial | p.M11           | -           | -                         |
| 65,M | AML             | United States | Familial | p.M11           | -           | -                         |
| 73,M | sAML            | United States | Familial | p.Q41*          | -           | <i>ASXL1</i>              |
| 69,F | sAML            | United States | Familial | p.D140fs        | -           | <i>JAK2</i>               |
| 73,M | sAML            | United States | Familial | p.D140fs        | -           | <i>SMC3, TP53</i>         |
| 66,M | Higher-risk MDS | United States | Familial | p.P258L         | -           | <i>ASXL1</i>              |
| 50,M | MDS             | United States | Familial | p.R339L         | -           | -                         |
| 51,M | MDS             | United States | Familial | p.R339L         | -           | -                         |
| 87,F | MDS             | United States | Familial | p.R339L         | -           | -                         |
| 63,M | MDS             | United States | Familial | p.R369G         | -           | -                         |
| 62,F | AML             | United States | Familial | p.R369G         | -           | -                         |
| 67,M | MDS             | United States | Familial | p.L574fs        | -           | -                         |
| 80,F | AML             | United States | Sporadic | p.E512fs        | p.R525H     | <i>CBL, DNMT3A, SF3B1</i> |

MN:myeloid neoplasms, P/LP: pathogenic/likely pathogenic

**Supplemental Table 4. Odds ratios of *DDX41* variants in the Japanese population.**

| Allele               | Counts in healthy donors (n=20,238) | Counts in MNs (n=4,461) | Odds ratio (95% CI)  | P value                | Counts in MDS (n=1,902) | Odds ratio (95% CI)   | P value                | Counts in AML (n=1,688) | Odds ratio (95% CI)   | P value                |
|----------------------|-------------------------------------|-------------------------|----------------------|------------------------|-------------------------|-----------------------|------------------------|-------------------------|-----------------------|------------------------|
| p.S493S              | 260                                 | 64                      | 1.12 ( 0.84 – 1.48 ) | 0.424                  | 27                      | 1.11 ( 0.72 – 1.66 )  | 0.596                  | 21                      | 0.97 ( 0.61 – 1.52 )  | 1.000                  |
| p.E3K                | 8                                   | 2                       | 1.13 ( 0.17 – 5.63 ) | 0.699                  | 2                       | 2.66 ( 0.41 – 13.2 )  | 0.210                  | 0                       | 0.00 ( 0.00 – 6.89 )  | 1.000                  |
| p.A555A              | 19                                  | 5                       | 1.19 ( 0.43 – 3.23 ) | 0.789                  | 3                       | 1.68 ( 0.42 – 5.46 )  | 0.430                  | 1                       | 0.63 ( 0.03 – 3.88 )  | 1.000                  |
| p.K187R              | 15                                  | 6                       | 1.82 ( 0.69 – 4.65 ) | 0.250                  | 2                       | 1.42 ( 0.23 – 5.74 )  | 0.653                  | 3                       | 2.40 ( 0.59 – 8.50 )  | 0.157                  |
| p.P35R               | 29                                  | 12                      | 1.88 ( 0.91 – 3.73 ) | 6.81x10 <sup>-2</sup>  | 4                       | 1.47 ( 0.47 – 4.25 )  | 0.525                  | 6                       | 2.49 ( 1.01 – 5.86 )  | 4.88x10 <sup>-2</sup>  |
| p.E256K              | 4                                   | 4                       | 4.54 ( 1.08 – 19.0 ) | 4.02x10 <sup>-2</sup>  | 3                       | 7.99 ( 1.57 – 36.7 )  | 1.70x10 <sup>-2</sup>  | 1                       | 3.00 ( 0.12 – 23.0 )  | 0.330                  |
| p.A500fs             | 36                                  | 78                      | 9.98 ( 6.68 – 14.9 ) | <1.00x10 <sup>-3</sup> | 45                      | 13.59 ( 8.65 – 21.3 ) | <1.00x10 <sup>-3</sup> | 32                      | 10.84 ( 6.59 – 17.5 ) | <1.00x10 <sup>-3</sup> |
| p.E7*                | 3                                   | 7                       | 10.6 ( 2.79 – 47.5 ) | <1.00x10 <sup>-3</sup> | 7                       | 24.91 ( 6.56 – 112 )  | <1.00x10 <sup>-3</sup> | 0                       | 0.00 ( 0.00 – 20.6 )  | 1.000                  |
| p.Y259C              | 5                                   | 13                      | 11.8 ( 4.05 – 34.5 ) | <1.00x10 <sup>-3</sup> | 9                       | 19.24 ( 6.31 – 59.3 ) | <1.00x10 <sup>-3</sup> | 3                       | 7.20 ( 1.50 – 29.5 )  | 1.90x10 <sup>-2</sup>  |
| p.S363del            | 3                                   | 15                      | 22.8 ( 6.43 – 92.3 ) | <1.00x10 <sup>-3</sup> | 11                      | 39.18 ( 10.7 – 164 )  | <1.00x10 <sup>-3</sup> | 4                       | 16.02 ( 3.49 – 81.3 ) | 1.00x10 <sup>-3</sup>  |
| Significant alleles# | 51                                  | 117                     | 10.7 ( 7.63 – 15.0 ) | <1.00x10 <sup>-3</sup> | 75                      | 16.24 ( 11.3 – 23.5 ) | <1.00x10 <sup>-3</sup> | 45                      | 7.56 ( 5.13 – 11.2 )  | <1.00x10 <sup>-3</sup> |

# p.E256K, p.A500fs, p.E7\*, p.Y259C, and p.S363del

**Supplemental Table 5. Regional distributions of *DDX41* germline variants in the gnomAD database. (ver.2.1.1).**

| Allele        | Annotation           | European<br>(n = ~57,000) | Finnish<br>(n = ~11,000) | Ashkenazi<br>Jewish<br>(n = ~5,000) | Latino<br>American<br>(n = ~17,000) | African<br>American<br>(n = ~8,000) | South Asian<br>(n = ~15,000) | East Asian<br>(n = ~9,000) |
|---------------|----------------------|---------------------------|--------------------------|-------------------------------------|-------------------------------------|-------------------------------------|------------------------------|----------------------------|
| p.Asp140Glyfs | Nonsense             | 22                        | 0                        | 0                                   | 0                                   | 1                                   | 0                            | 0                          |
| p.Met11       | Start codon          | 19                        | 2                        | 1                                   | 1                                   | 0                                   | 0                            | 0                          |
| p.Arg159*     | Nonsense             | 4                         | 0                        | 0                                   | 1                                   | 0                                   | 0                            | 0                          |
| p.Gln41*      | Nonsense             | 4                         | 0                        | 0                                   | 0                                   | 0                                   | 0                            | 0                          |
| p.Phe535Serfs | Frameshift           | 3                         | 0                        | 0                                   | 0                                   | 0                                   | 0                            | 0                          |
| p.Met316Aspfs | Frameshift           | 3                         | 0                        | 0                                   | 0                                   | 0                                   | 0                            | 0                          |
| c.936-1G>T    | Splice acceptor site | 2                         | 0                        | 0                                   | 0                                   | 0                                   | 0                            | 0                          |
| p.Gln90*      | Nonsense             | 2                         | 0                        | 0                                   | 0                                   | 0                                   | 0                            | 0                          |
| p.Arg311*     | Nonsense             | 1                         | 0                        | 0                                   | 1                                   | 0                                   | 0                            | 0                          |
| p.Glu268Aspfs | Frameshift           | 1                         | 0                        | 0                                   | 1                                   | 0                                   | 0                            | 0                          |
| p.Arg369*     | Nonsense             | 1                         | 0                        | 0                                   | 0                                   | 2                                   | 0                            | 0                          |
| p.Lys102Argfs | Frameshift           | 1                         | 0                        | 0                                   | 0                                   | 0                                   | 1                            | 1                          |
| c.1732+1G>C   | Splice donor site    | 1                         | 0                        | 0                                   | 0                                   | 0                                   | 0                            | 0                          |
| p.Thr529Argfs | Frameshift           | 1                         | 0                        | 0                                   | 0                                   | 0                                   | 0                            | 0                          |
| p.Val517Glufs | Frameshift           | 1                         | 0                        | 0                                   | 0                                   | 0                                   | 0                            | 0                          |
| p.Ala492Glyfs | Frameshift           | 1                         | 0                        | 0                                   | 0                                   | 0                                   | 0                            | 0                          |
| p.Gly481Alafs | Frameshift           | 1                         | 0                        | 0                                   | 0                                   | 0                                   | 0                            | 0                          |
| p.Gly465Alafs | Frameshift           | 1                         | 0                        | 0                                   | 0                                   | 0                                   | 0                            | 0                          |
| p.Lys381*     | Nonsense             | 1                         | 0                        | 0                                   | 0                                   | 0                                   | 0                            | 0                          |
| p.Gln329*     | Nonsense             | 1                         | 0                        | 0                                   | 0                                   | 0                                   | 0                            | 0                          |
| c.936-1G>A    | Splice acceptor site | 1                         | 0                        | 0                                   | 0                                   | 0                                   | 0                            | 0                          |
| c.435-1G>A    | Splice acceptor site | 1                         | 0                        | 0                                   | 0                                   | 0                                   | 0                            | 0                          |
| c.435-2A>C    | Splice acceptor site | 1                         | 0                        | 0                                   | 0                                   | 0                                   | 0                            | 0                          |
| p.Arg124Glufs | Frameshift           | 1                         | 0                        | 0                                   | 0                                   | 0                                   | 0                            | 0                          |
| c.298+2T>A    | Splice donor site    | 1                         | 0                        | 0                                   | 0                                   | 0                                   | 0                            | 0                          |
| c.138+1G>A    | Splice donor site    | 1                         | 0                        | 0                                   | 0                                   | 0                                   | 0                            | 0                          |
| p.Gln44*      | Nonsense             | 1                         | 0                        | 0                                   | 0                                   | 0                                   | 0                            | 0                          |
| p.Pro19Argfs  | Frameshift           | 1                         | 0                        | 0                                   | 0                                   | 0                                   | 0                            | 0                          |
| p.Tyr167*     | Nonsense             | 0                         | 0                        | 0                                   | 1                                   | 0                                   | 0                            | 0                          |
| p.Gly23Argfs  | Frameshift           | 0                         | 0                        | 0                                   | 1                                   | 0                                   | 0                            | 0                          |
| p.Gln48*      | Nonsense             | 0                         | 0                        | 0                                   | 0                                   | 3                                   | 0                            | 0                          |
| p.Lys597*     | Nonsense             | 0                         | 0                        | 0                                   | 0                                   | 1                                   | 0                            | 0                          |
| p.Ala403Leufs | Frameshift           | 0                         | 0                        | 0                                   | 0                                   | 1                                   | 0                            | 0                          |
| p.Asn397Lysfs | Frameshift           | 0                         | 0                        | 0                                   | 0                                   | 1                                   | 0                            | 0                          |
| p.Val412Glyfs | Frameshift           | 0                         | 0                        | 0                                   | 0                                   | 0                                   | 5                            | 0                          |
| c.1622-2dupA  | Splice acceptor site | 0                         | 0                        | 0                                   | 0                                   | 0                                   | 3                            | 0                          |
| p.Met301Hisfs | Frameshift           | 0                         | 0                        | 0                                   | 0                                   | 0                                   | 1                            | 0                          |
| p.Ile520Alafs | Frameshift           | 0                         | 0                        | 0                                   | 0                                   | 0                                   | 0                            | 2                          |
| p.Ala500Cysfs | Frameshift           | 0                         | 0                        | 0                                   | 0                                   | 0                                   | 0                            | 2                          |
| p.Leu615Trpfs | Frameshift           | 0                         | 0                        | 0                                   | 0                                   | 0                                   | 0                            | 1                          |
| p.Tyr507*     | Nonsense             | 0                         | 0                        | 0                                   | 0                                   | 0                                   | 0                            | 1                          |
| p.Lys392Argfs | Frameshift           | 0                         | 0                        | 0                                   | 0                                   | 0                                   | 0                            | 1                          |
| p.Ser217Ilefs | Frameshift           | 0                         | 0                        | 0                                   | 0                                   | 0                                   | 0                            | 1                          |
| c.644+1delG   | Splice donor site    | 0                         | 0                        | 0                                   | 0                                   | 0                                   | 0                            | 1                          |
| p.Ser21Thrfs  | Frameshift           | 0                         | 0                        | 0                                   | 0                                   | 0                                   | 0                            | 1                          |
| p.Glu3Argfs   | Frameshift           | 0                         | 0                        | 0                                   | 0                                   | 0                                   | 0                            | 1                          |



**Table S5. Odds ratios of male vs . female healthy donors with *DDX41* variants.**

| Allele          | Counts of carriers in male healthy donors | Counts of carriers in female healthy donors | Counts of non-carriers in male healthy donors | Counts of non-carriers in female healthy donors | Odds ratio (95% CI)              | P value |
|-----------------|-------------------------------------------|---------------------------------------------|-----------------------------------------------|-------------------------------------------------|----------------------------------|---------|
| p.S493S         | 59                                        | 57                                          | 5679                                          | 5057                                            | 0.92 ( 0.64 – 1.34 )             | 0.709   |
| p.E3K           | 4                                         | 2                                           | 5734                                          | 5112                                            | 1.78 ( 0.33 – 13.3 )             | 0.691   |
| p.A555A         | 9                                         | 5                                           | 5729                                          | 5109                                            | 1.61 ( 0.53 – 4.95 )             | 0.434   |
| p.K187R         | 6                                         | 4                                           | 5732                                          | 5110                                            | 1.34 ( 0.37 – 5.05 )             | 0.758   |
| p.P35R          | 4                                         | 6                                           | 5734                                          | 5108                                            | 0.59 ( 0.16 – 2.17 )             | 0.531   |
| p.E256K         | 2                                         | 0                                           | 5736                                          | 5114                                            | Infinitive ( 0.26 – Infinitive ) | 0.502   |
| p.A500fs        | 7                                         | 10                                          | 5731                                          | 5104                                            | 0.62 ( 0.22 – 1.66 )             | 0.345   |
| p.E7*           | 1                                         | 1                                           | 5737                                          | 5113                                            | 0.89 ( 0.02 – 34.3 )             | 1.000   |
| p.Y259C         | 0                                         | 2                                           | 5738                                          | 5112                                            | 0.0 ( 0.00 – 3.09 )              | 0.222   |
| p.S363del       | 1                                         | 0                                           | 5737                                          | 5114                                            | 2.7 ( 0.11 – 65.7 )              | 1.000   |
| all pathogenic# | 28                                        | 25                                          | 5710                                          | 5089                                            | 1.00 ( 0.58 – 1.75 )             | 1.000   |

# Pathogenic variants were defined according to the ACMG standards and guidelines.

**Supplemental Table 7. Impact of clinical and genetic factors on leukemic progression.**

**Whole MDS**

**Univariable**

| <b>Variables</b>                 | <b>Hazard ratio</b> | <b>95% confidence intervals</b> | <b>P value</b>         |
|----------------------------------|---------------------|---------------------------------|------------------------|
| IPSSR                            | 1.68                | 1.51–1.87                       | $<1.0 \times 10^{-15}$ |
| Lower-risk vs. Higher-risk       | 3.94                | 3.04–5.11                       | $<1.0 \times 10^{-15}$ |
| <i>DDX41</i> truncating mutation | 2.53                | 1.76–3.62                       | $4.7 \times 10^{-7}$   |

**Multivariable\***

| <b>Variables</b>                 | <b>Hazard ratio</b> | <b>95% confidence intervals</b> | <b>P value</b>       |
|----------------------------------|---------------------|---------------------------------|----------------------|
| IPSSR                            | 1.35                | 1.18–1.54                       | $7.8 \times 10^{-6}$ |
| Lower-risk vs. Higher-risk       | 2.51                | 1.74–3.60                       | $6.9 \times 10^{-7}$ |
| <i>DDX41</i> truncating mutation | 1.7                 | 1.13–2.55                       | $1.1 \times 10^{-2}$ |

***DDX41* -mutated MDS**

**Univariable**

| <b>Variables</b>                 | <b>Hazard ratio</b> | <b>95% confidence intervals</b> | <b>P value</b>       |
|----------------------------------|---------------------|---------------------------------|----------------------|
| IPSSR                            | 1.34                | 1.00–1.79                       | $4.9 \times 10^{-2}$ |
| Lower-risk v.s. Higher-risk      | 5.11                | 1.61–16.2                       | $5.6 \times 10^{-3}$ |
| <i>DDX41</i> truncating mutation | 4.25                | 2.01–8.97                       | $1.5 \times 10^{-4}$ |

**Multivariable\***

| <b>Variables</b>                 | <b>Hazard ratio</b> | <b>95% confidence intervals</b> | <b>P value</b>       |
|----------------------------------|---------------------|---------------------------------|----------------------|
| <i>DDX41</i> truncating mutation | 5.05                | 2.18–11.7                       | $1.5 \times 10^{-4}$ |

\*Stepwise variable selection by *P* values
